# Supplementary material for: Accurate experimental characterization of the labile N–Cl bond inN-chloro-N′-(p-fluorophenyl)-benzamidine crystal at 17.5 K
Source: Royal Society of Chemistry journal article supplement (doi:10.1039/d2ce00957a), 2022-01-01
Supplement: d2ce00957a2.pdf [file d2ce00957a2.pdf]

# Accurate experimental characterization of the labile N–Cl bond in N-chloro-N'-(*p*- fluorophenyl)-benzamidine crystal at 17.5 K

Riccardo Destro,<sup>1</sup> Mario Barzaghi,<sup>2</sup> Raffaella Soave,<sup>3</sup> Pietro Roversi<sup>4,5</sup> and Leonardo Lo Presti<sup>1,6,\*</sup>

<sup>1</sup> Università degli Studi di Milano, Department of Chemistry, Via Golgi 19, 20133 Milano (Italy)

<sup>2</sup> Consiglio Nazionale delle Ricerche (CNR), Piazzale Aldo Moro 7, 00185 Roma (Italy)

<sup>3</sup> Consiglio Nazionale delle Ricerche (CNR), Istituto di Scienze E Tecnologie Chimiche “Giulio Natta” (SCITEC), Via Golgi 19, 20133 Milano (Italy)

<sup>4</sup> Consiglio Nazionale delle Ricerche - IBBA, Via Bassini 15, 20133 Milano (Italy)

<sup>5</sup> Leicester Institute of Chemical and Structural Biology and Department of Molecular and Cell Biology, University of Leicester, Henry Wellcome Building, Lancaster Road, Leicester LE1 7HR, United Kingdom

<sup>6</sup> Istituto Nazionale di Fisica Nucleare (INFN), Laboratori Nazionali di Frascati, Frascati (Italy)

\* To whom correspondence should be addressed: [leonardo.lopresti@unimi.it](mailto:leonardo.lopresti@unimi.it)

## SUPPLEMENTARY MATERIAL

## *S1. Details of the data collection*

### *S1.1 First sample*

Unaware of the relatively high vapor pressure of this compound, we glued a sample (ground to an approximate sphere 0.5 mm in diameter) on the tip of a glass fiber at the center of the vacuum shroud ( $P \approx 10^{-8}$  mbar) without enclosing the crystal into a protective medium, and the temperature was gradually lowered. In the few hours necessary to reach the lowest temperature the crystal diameter decreased to 0.45 mm, then the volume remained unchanged for the following  $\sim 340$  hours of exposure to X-rays at constant low pressure and low T. But visual inspection and profile analysis showed that a crystal fracture had occurred during data collection, and the 12158 intensities measured from this sample were discarded.

### *S1.2 Second sample*

The first stop, that lasted 86 days, occurred after 336.7 hours of exposure of the crystal to X-rays, with the generator operating at high power (50kV and 25mA) for 299.7 h, and at low power (30kV and 3mA) for the following 37 h. The lower current radiation was employed to re-measure low-angle data, to minimize possible problems associated with nonlinearity of the photon counting system. When the crystal was removed from the cryostat and brought back to room temperature, its enclosure into the capillary showed very effective, since no reduction of volume nor fractures were noticeable, but it was no longer transparent and appeared pale yellow. This first portion of the data set comprised 13526 diffracted intensities.

Before restarting the regular data collection the crystal was exposed to the high-power X-rays for 72.3 hours, to perform background and profile measurements necessary for the subsequent treatment of truncation errors, according to the procedure regularly applied in our laboratory for accurate charge-density studies.<sup>1-6</sup> A second stop, lasting four days, was required by a sudden failure of the vacuum system just after the resumption of intensity measurements, with only 603 new data collected. At the opening of the cryostat the crystal color showed to be slightly darker than at the beginning of this data-collection step. After replacement of some cryostat components, a low temperature around 17 K was reached and maintained until the end of the data collection, more than 300 hours later, when the crystal color had become brown.

*S2. List of Cambridge Structural Database reference codes employed to study the N–Cl bond*

AZCFOM01  
ENAJIO  
FEVNUP  
GUGREH  
NUJJAF  
NUXXOV  
PASJAV  
RAQBIX  
SEMHOI  
TIYDAI  
TIYDOW  
TIYDOW01  
TIYFAK  
TUWDIY  
XOLYAA

### S3. Input stream for periodic quantum simulations (CRYSTAL)

```

N-CL 20 K exp geom P3(1)
CRYSTAL
0 0 0
144
10.0227 9.8795 120.0
27
17 0.089013 0.118406 0.000000
9 -0.160927 -0.794176 0.140331
7 0.209995 0.098324 0.115595
7 0.053783 -0.170978 0.078869
6 0.172367 -0.044991 0.136584
6 0.272930 -0.061649 0.238114
6 0.210421 -0.143198 0.358411
6 0.308218 -0.149467 0.455553
6 0.467106 -0.074594 0.432856
6 0.528832 0.004856 0.312118
6 0.431602 0.011242 0.214466
6 0.005815 -0.328214 0.103924
6 0.108419 -0.384318 0.110701
6 0.051902 -0.542012 0.127067
6 -0.106276 -0.640499 0.132155
6 -0.210227 -0.587647 0.127455
6 -0.152639 -0.429736 0.114630
1 0.087910 -0.195190 0.375840
1 0.261490 -0.204300 0.553500
1 0.542960 -0.078300 0.509220
1 0.651200 0.060410 0.294370
1 0.479520 0.074300 0.121750
1 0.230980 -0.308120 0.102840
1 0.126800 -0.590660 0.131650
1 -0.333690 -0.661900 0.133580
1 -0.228850 -0.384140 0.110880
1 -0.016150 -0.155980 0.014100
ATOMORDE
SYMMOPS
OPTGEOM
ATOMONLY
MAXCYCLE
100
ENDOPT
ENDGEOM
17 10
0 0 7 2.0 1.0
69507.990945 0.00054314897497
10426.156880 0.00419904639610
2373.2334061 0.02159214167900
671.56420071 0.08459885009400
218.41999790 0.24757249724000
77.572249714 0.47016930228000
28.888815277 0.37436370716000
0 0 3 2.0 1.0
127.10527185 0.02518216660300
39.339582961 0.10786112456000
7.6740679989 -0.27408821574000
0 0 2 2.0 1.0
3.8745627630 1.32138750140000
1.8385832573 0.68636955368000
0 0 1 0.0 1.0
0.4498594500 1.000000000000000
0 0 1 0.0 1.0
0.1363703100 1.000000000000000
0 2 5 6.0 1.0
666.50423284 0.00236326638360
157.64241690 0.01887930037400
50.262520978 0.08720634127300
18.536078105 0.25285612970000
7.2940532777 0.43507154820000
0 2 1 5.0 1.0
2.80149164000 1.000000000000000
0 2 1 0.0 1.0
0.78964278000 1.000000000000000
0 2 1 0.0 1.0
0.21056105000 1.000000000000000
0 3 1 0.0 1.0
0.23728440000 1.000000000000000
9 8
0 0 6 2.0 1.0
35479.100441 0.00021545014888
5318.4728983 0.00167006865270
1210.4810975 0.00867332114760
342.85518140 0.03504993317500
112.01943181 0.11165320133000
40.714740248 0.25988506647000
0 0 2 2.0 1.0
16.039678111 0.39422966880000
6.5038186740 0.24998238551000
0 0 1 0.0 1.0
1.4420074900 1.000000000000000
0 0 1 0.0 1.0
0.4597725800 1.000000000000000
0 2 4 5.0 1.0
80.233900483 0.00636859991340
18.594010743 0.04430314353000
5.6867902653 0.16867248708000
1.9511006294 0.36166346255000
0 2 1 0.0 1.0
0.6922845200 1.000000000000000
0 2 1 0.0 1.0
0.1983553200 1.000000000000000
0 3 1 0.0 1.0
1.0631263500 1.000000000000000
7 8
0 0 6 2.0 1.0
19730.800647 0.00021887984991
2957.8958745 0.00169607088030
673.22133595 0.00879546035380
190.68249494 0.03535938260500
62.295441898 0.11095789217000
22.654161182 0.24982972552000
0 0 2 2.0 1.0
8.9791477428 0.4062389614800
3.6863002370 0.2433821717600
0 0 1 0.0 1.0
0.7865398200 1.000000000000000
0 0 1 0.0 1.0
0.2677997200 1.000000000000000
0 2 4 3.0 1.0
49.200380510 0.0055552416751
11.346790537 0.0380523797230
3.4273972411 0.1495367102900
1.1785525134 0.3494930523000
0 2 1 0.0 1.0
0.3780331700 1.000000000000000
0 2 1 0.0 1.0
0.1473661500 1.000000000000000
0 3 1 0.0 1.0
0.3612294900 1.000000000000000
6 8
0 0 6 2.0 1.0
13575.349682 0.00022245814352
2035.2333680 0.00172327382520
463.22562359 0.00892557153140
131.20019598 0.03572798450200
42.853015891 0.11076259931000
15.584185766 0.24295627626000
0 0 2 2.0 1.0
6.2067138508 0.41440263448000
2.5764896527 0.23744968655000
0 0 1 0.0 1.0
0.4941102000 1.000000000000000
0 0 1 0.0 1.0
0.1644071000 1.000000000000000
0 2 4 2.0 1.0
34.697232244 0.00533336578050
7.9582622826 0.03586410909200
2.3780826883 0.14215873329000
0.8143320818 0.34270471845000
0 2 1 0.0 1.0
0.5662417100 1.000000000000000
0 2 1 0.0 1.0

```

```
0.1973545000 1.0000000000000000
0 3 1 0.0 1.0
0.5791584200 1.0000000000000000
1 4
0 0 3 1.0 1.0
34.061341000 0.00602519780
5.1235746000 0.04502109400
1.1646626000 0.20189726000
0 0 1 0.0 1.0
0.5157455100 1.0000000000000000
0 0 1 0.0 1.0
0.1795111000 1.0000000000000000
0 2 1 0.0 1.0
0.5000000000 1.0000000000000000
99 0
ENDBASIS
DFT
PBEO
ENDDFT
```

```
SHRINK
4 4
GRIMME
1.05 20. 25.
5
1 0.14 1.001
6 1.75 1.452
7 1.23 1.397
9 0.75 1.287
17 5.07 1.639
LEVSHIFT
5 0
FMIXING
30
TOLINTEG
8 8 8 8 16
PPAN
ENDSCF
STOP
```

#### *S4. Estimation of the absorbed dose*

The operational parameters of the current data collections are  $\lambda = 0.71073 \text{ \AA}$  at a nominal 50 kV x 25 mA (1250 W) power of the generator. If this was fully converted into radiation, as each photon carries  $17.44 \text{ keV} = 2.79 \cdot 10^{-15} \text{ J}$  of energy, we expect an upper limit theoretical flux of  $4.48 \cdot 10^{17}$  photons per second. We do not know the quantum efficiency of our fine-focus X-ray sealed tube, but we expect it is of the order of 1 %, of which only ~6.6 % will belong to the characteristic  $K\alpha$  fluorescence line. Another factor of ~0.007 comes from ratio between the area of the Be window and the whole solid angle. Considering a further reduction of ~ 1/100 due to monochromator, collimator and air, a cautious total factor of  $3.57 \cdot 10^{-9}$  could be employed to account for all the energy losses. This leaves out a flux of  $1.60 \cdot 10^9$  photons/s, corresponding to a total of  $4.32 \cdot 10^{15}$  photons possibly able to interact with the sample over the whole period of 750 hrs of exposure to X-rays. As the  $\mu R$  factor reads 0.081 (Table 1 in the main text), the amount of absorbed radiation is  $1 - e^{-0.081}$  and the total amount of energy transferred to the crystal should be of the order of 0.9 J.

As the specimen is a sphere with a diameter of 0.5 mm, the total volume is  $6.54 \cdot 10^{-5} \text{ cm}^3$ , corresponding to a mass of  $9.43 \cdot 10^{-8} \text{ kg}$  owing the X-ray estimated density of  $1.441 \text{ g} \cdot \text{cm}^{-3}$ . Finally, the amount of absorbed dose in Grays (Gy) is  $0.9 \text{ J} / 9.43 \cdot 10^{-8} \text{ kg} = 9.5 \text{ MGy}$ . For X-rays, we expect that the amount of effective dose, that is, the dose able to cause damage, be equal to the absorbed one.

## S5. Crystal packing

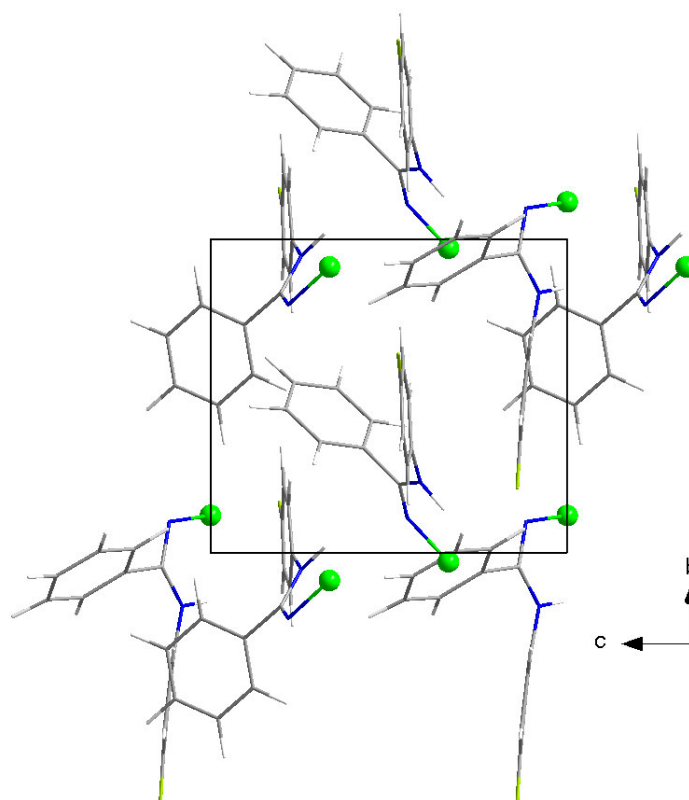

**Figure S1.** Wires-stick model of NCLBA crystal packing along the  $a$  axis. Molecules wrap along  $c$  around the  $3_1$  screw, setting up a helix motif where chlorine atoms (green spheres) are allocated in the free space between neighboring molecules.

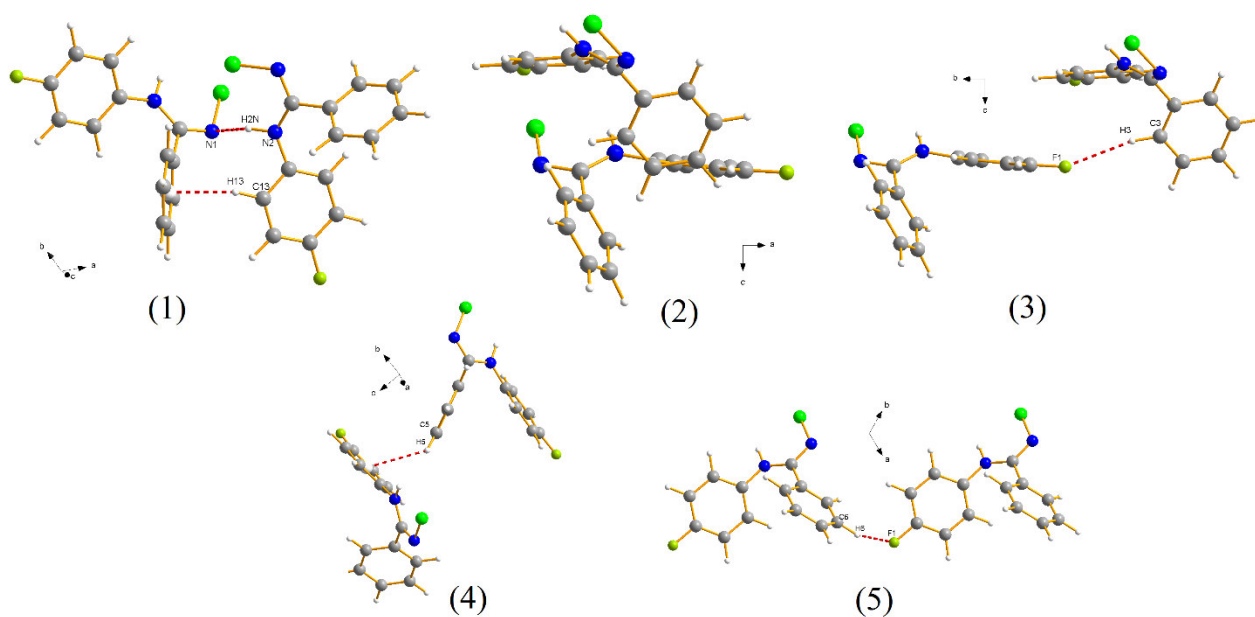

**Figure S2.** Ball-and-stick representations of molecular pairs shown in Table 2, from the most to the least negative interaction energy (see main text and Table 2 for numbering).  $H\cdots$ Acceptor contacts are highlighted as red dashed lines.

S6. Results of multipole refinements

**Table S1.** Results of the multipolar refinement of NCLBA with VALRAY2000.  $l_{\max}$  is the maximum order of the multipole expansion;  $C_{ijk}$  and  $D_{ijkl}$  signal that the Gram-Charlier third and fourth order cumulants are also active in the least-squares (l.s.) refinement.

| Model                                                                           | A<br>C,N,F,Cl: $l_{\max}=3$<br>H: $l_{\max}=2$ | B<br>C,N,F,Cl: $l_{\max}=4$<br>H: $l_{\max}=2$ | C<br>Model B +<br>$C_{ijk}(Cl)$ | D<br>Model C +<br>$D_{ijkl}(Cl)$ | E <sup>(a)</sup><br>Model B+ $C_{ijk}$ +<br>$D_{ijkl}(Cl,F)$ |
|---------------------------------------------------------------------------------|------------------------------------------------|------------------------------------------------|---------------------------------|----------------------------------|--------------------------------------------------------------|
| Scale factor                                                                    | 1.0065(9)                                      | 1.004(1)                                       | 1.004(1)                        | 1.003(1)                         | 1.000(2)                                                     |
| Extin. coeff. $g_{11}$                                                          | 0.177(7)                                       | 0.163(7)                                       | 0.164(7)                        | 0.159(7)                         | 0.161(8)                                                     |
| N. variables ( $N_v$ )                                                          | 517                                            | 670                                            | 680                             | 695                              | 680                                                          |
| $N_{\text{obs}}/N_v$                                                            | 27.7                                           | 21.4                                           | 21.0                            | 20.6                             | 21.0                                                         |
| On all 14309 observed ( $I>0$ ) data                                            |                                                |                                                |                                 |                                  |                                                              |
| $\sum w\Delta^2$                                                                | 14060.8796                                     | 13375.6562                                     | 13312.0334                      | 13115.7719                       | 12695.6271                                                   |
| G.o.f.                                                                          | 1.0097                                         | 0.9903                                         | 0.9883                          | 0.9815                           | 0.9652                                                       |
| R(F), R(F <sup>2</sup> )                                                        | 0.0165, 0.0195                                 | 0.0162, 0.0189                                 | 0.0162, 0.0188                  | 0.0161, 0.0187                   | 0.0159, 0.0177                                               |
| $R_w(F^2)$                                                                      | 0.0289                                         | 0.0281                                         | 0.0281                          | 0.0279                           | 0.0274                                                       |
| On 402 data with $(\sin\theta/\lambda) \leq 0.35$ (low-angle data)              |                                                |                                                |                                 |                                  |                                                              |
| R(F), R(F <sup>2</sup> )                                                        | 0.0055, 0.0115                                 | 0.0052, 0.0110                                 | 0.0052, 0.0110                  | 0.0051, 0.0107                   | 0.0041, 0.0085                                               |
| $R_w(F^2)$                                                                      | 0.0136                                         | 0.0128                                         | 0.0128                          | 0.0127                           | 0.0101                                                       |
| On 2625 data with $(\sin\theta/\lambda) \leq 0.35$ (i.e. within the Cu sphere)  |                                                |                                                |                                 |                                  |                                                              |
| R(F), R(F <sup>2</sup> )                                                        | 0.0079, 0.0135                                 | 0.0075, 0.0129                                 | 0.0075, 0.0128                  | 0.0074, 0.0126                   | 0.0069, 0.0111                                               |
| $R_w(F^2)$                                                                      | 0.0183                                         | 0.0171                                         | 0.0171                          | 0.0169                           | 0.0159                                                       |
| On 11684 data with $0.65 \leq (\sin\theta/\lambda) \leq 1.15$ (high-angle data) |                                                |                                                |                                 |                                  |                                                              |
| R(F), R(F <sup>2</sup> )                                                        | 0.0209, 0.0271                                 | 0.0207, 0.0264                                 | 0.0207, 0.0264                  | 0.0206, 0.0262                   | 0.0205, 0.0259                                               |
| $R_w(F^2)$                                                                      | 0.0343                                         | 0.0337                                         | 0.0336                          | 0.0334                           | 0.0331                                                       |
| On 13437 data with $I > 3\sigma(I)$                                             |                                                |                                                |                                 |                                  |                                                              |
| Scale factor                                                                    | 1.007(1)                                       | 1.005(1)                                       | 1.005(1)                        | 1.003(1)                         | 1.000(2)                                                     |
| Extin. coeff. $g_{11}$                                                          | 0.178(7)                                       | 0.164(7)                                       | 0.165(7)                        | 0.159(7)                         | 0.161(9)                                                     |
| $\sum w\Delta^2$                                                                | 13458.2806                                     | 12774.7585                                     | 12714.6099                      | 12515.3106                       | 12102.4548                                                   |
| G.o.f.                                                                          | 1.0206                                         | 1.0003                                         | 0.9983                          | 0.9911                           | 0.9740                                                       |
| R(F), R(F <sup>2</sup> )                                                        | 0.0144, 0.0191                                 | 0.0141, 0.0185                                 | 0.0141, 0.0184                  | 0.0140, 0.0182                   | 0.0137, 0.0173                                               |
| $R_w(F^2)$                                                                      | 0.0282                                         | 0.0275                                         | 0.0274                          | 0.0272                           | 0.0268                                                       |
| $N_{\text{obs}}/N_v$                                                            | 26.0                                           | 20.1                                           | 19.8                            | 19.3                             | 20.1                                                         |
| $\Delta\rho$ min ( $e \text{ \AA}^{-3}$ )                                       | -0.3373                                        | -0.2763                                        | -0.2727                         | -0.2698                          | -0.2478                                                      |
| At X,Y,Z                                                                        | 0.127, 0.162,<br>-0.016                        | -0.100, -0.400,<br>0.126                       | -0.100, -0.400,<br>0.126        | -0.100, -0.400,<br>0.126         | 0.151, 0.262,<br>0.016                                       |
| $\Delta\rho$ max ( $e \text{ \AA}^{-3}$ )                                       | 0.5095                                         | 0.3329                                         | 0.2835                          | 0.3031                           | 0.2575                                                       |
| At X,Y,Z                                                                        | 0.127, 0.162,<br>0.028                         | 0.123, 0.155,<br>0.030                         | -0.219, 0.162,<br>0.097         | -0.223, 0.155,<br>0.094          | -0.223, 0.154,<br>0.093                                      |

(a) Includes 10 radial parameters to be refined;  $C_{ijk}$  and  $D_{ijkl}$  of halogen atoms kept at the values obtained after their previous l.s. refinement.



**Table S2.** Final geometric and multipole parameters retrieved from model “E” (Table S1).

Box 1: atom specie, atom number, crystallographic coordinates / six  $U_{ij}$  tensor elements in the following order:  $U_{11}$ ,  $U_{22}$ ,  $U_{33}$ ,  $U_{12}$ ,  $U_{13}$ ,  $U_{23}$  (note that the order of the off-diagonal elements is reversed with respect to the standard shelx notation)

| SCALE | 1.000443 | 1         | 4         |          |          |           |           |
|-------|----------|-----------|-----------|----------|----------|-----------|-----------|
| ATOM  | CL 01    | 0.089013  | 0.118406  | 0.000000 |          |           | 0         |
| UIJ   | CL 01    | 0.006344  | 0.005217  | 0.007368 | 0.003193 | -0.000429 | 0.000692  |
| ATOM  | F 01     | -0.160927 | -0.794176 | 0.140331 |          |           | 0         |
| UIJ   | F 01     | 0.013114  | 0.004179  | 0.016161 | 0.004909 | 0.002581  | 0.002873  |
| ATOM  | N 01     | 0.209995  | 0.098324  | 0.115595 |          |           | 0         |
| UIJ   | N 01     | 0.006229  | 0.004153  | 0.007640 | 0.002176 | -0.001386 | 0.000021  |
| ATOM  | N 02     | 0.053783  | -0.170978 | 0.078869 |          |           | 0         |
| UIJ   | N 02     | 0.006778  | 0.003780  | 0.009682 | 0.002141 | -0.003751 | -0.000549 |
| ATOM  | C 01     | 0.172367  | -0.044991 | 0.136584 |          |           | 0         |
| UIJ   | C 01     | 0.004639  | 0.004051  | 0.005792 | 0.001979 | -0.000816 | -0.000191 |
| ATOM  | C 02     | 0.272930  | -0.061649 | 0.238114 |          |           | 0         |
| UIJ   | C 02     | 0.004554  | 0.005236  | 0.005210 | 0.002164 | -0.000473 | 0.000191  |
| ATOM  | C 03     | 0.210421  | -0.143198 | 0.358411 |          |           | 0         |
| UIJ   | C 03     | 0.005177  | 0.007102  | 0.005741 | 0.002137 | 0.000101  | 0.000858  |
| ATOM  | C 04     | 0.308218  | -0.149467 | 0.455553 |          |           | 0         |
| UIJ   | C 04     | 0.007300  | 0.007983  | 0.005962 | 0.003113 | -0.000276 | 0.001384  |
| ATOM  | C 05     | 0.467106  | -0.074594 | 0.432856 |          |           | 0         |
| UIJ   | C 05     | 0.006969  | 0.008615  | 0.006982 | 0.004164 | -0.001172 | 0.000612  |
| ATOM  | C 06     | 0.528832  | 0.004856  | 0.312118 |          |           | 0         |
| UIJ   | C 06     | 0.005220  | 0.008653  | 0.007429 | 0.003484 | -0.000327 | 0.000603  |
| ATOM  | C 07     | 0.431602  | 0.011242  | 0.214466 |          |           | 0         |
| UIJ   | C 07     | 0.004848  | 0.007387  | 0.006205 | 0.002614 | 0.000137  | 0.001087  |
| ATOM  | C 08     | 0.005815  | -0.328214 | 0.103924 |          |           | 0         |
| UIJ   | C 08     | 0.005518  | 0.004116  | 0.007289 | 0.002392 | -0.001165 | -0.000194 |
| ATOM  | C 09     | 0.108419  | -0.384318 | 0.110701 |          |           | 0         |
| UIJ   | C 09     | 0.005951  | 0.005365  | 0.008785 | 0.003097 | -0.000219 | -0.000251 |
| ATOM  | C 010    | 0.051902  | -0.542012 | 0.127067 |          |           | 0         |
| UIJ   | C 010    | 0.007242  | 0.005991  | 0.009504 | 0.004223 | 0.000599  | 0.000486  |
| ATOM  | C 011    | -0.106276 | -0.640499 | 0.132155 |          |           | 0         |
| UIJ   | C 011    | 0.007755  | 0.004742  | 0.008732 | 0.003429 | 0.001266  | 0.001143  |
| ATOM  | C 012    | -0.210227 | -0.587647 | 0.127455 |          |           | 0         |
| UIJ   | C 012    | 0.006353  | 0.004961  | 0.012674 | 0.002501 | 0.000552  | 0.001084  |
| ATOM  | C 013    | -0.152639 | -0.429736 | 0.114630 |          |           | 0         |
| UIJ   | C 013    | 0.005666  | 0.004916  | 0.011492 | 0.002688 | -0.000771 | 0.000469  |
| ATOM  | HH 03    | 0.087910  | -0.195190 | 0.375840 |          |           | 0         |
| UIJ   | HH 03    | 0.011540  | 0.027490  | 0.022670 | 0.006550 | 0.002500  | 0.004690  |
| ATOM  | HH 04    | 0.261490  | -0.204300 | 0.553500 |          |           | 0         |
| UIJ   | HH 04    | 0.023070  | 0.029780  | 0.014970 | 0.009980 | 0.002850  | 0.008300  |
| ATOM  | HH 05    | 0.542960  | -0.078300 | 0.509220 |          |           | 0         |
| UIJ   | HH 05    | 0.020430  | 0.030330  | 0.020050 | 0.013800 | -0.006250 | 0.002960  |
| ATOM  | HH 06    | 0.651200  | 0.060410  | 0.294370 |          |           | 0         |
| UIJ   | HH 06    | 0.011330  | 0.030610  | 0.025610 | 0.008530 | 0.001330  | 0.004030  |
| ATOM  | HH 07    | 0.479520  | 0.074300  | 0.121750 |          |           | 0         |
| UIJ   | HH 07    | 0.018700  | 0.026630  | 0.016900 | 0.008700 | 0.003960  | 0.008680  |
| ATOM  | HH 09    | 0.230980  | -0.308120 | 0.102840 |          |           | 0         |
| UIJ   | HH 09    | 0.011610  | 0.017010  | 0.036170 | 0.005120 | 0.000580  | 0.000760  |
| ATOM  | HH 010   | 0.126800  | -0.590660 | 0.131650 |          |           | 0         |
| UIJ   | HH 010   | 0.020090  | 0.019790  | 0.037350 | 0.014760 | 0.001330  | 0.001220  |
| ATOM  | HH 012   | -0.333690 | -0.661900 | 0.133580 |          |           | 0         |
| UIJ   | HH 012   | 0.012340  | 0.016450  | 0.043930 | 0.004150 | 0.002730  | 0.003100  |
| ATOM  | HH 013   | -0.228850 | -0.384140 | 0.110880 |          |           | 0         |
| UIJ   | HH 013   | 0.016400  | 0.018380  | 0.039970 | 0.011890 | -0.001810 | 0.001040  |
| ATOM  | HH 02N   | -0.016150 | -0.155980 | 0.014100 |          |           | 0         |
| UIJ   | HH 02N   | 0.017970  | 0.014720  | 0.021870 | 0.008250 | -0.007680 | 0.000600  |

Box 2: for each atom, multipole coefficients in the following order: inner/intermediate/outer core spherical population, 3 dipoles, 5 quadrupoles, 7 octupoles (non-H only), 9 hexadecapoles (non-H only). Coefficients are organized as follows, “ $Y_{lm}$ ” being the corresponding spherical harmonic function (see Table 1 of the Valray users’ manual). Dipoles:  $Y_{11+}$ ,  $Y_{11-}$ ,  $Y_{10}$ . Quadrupoles:  $Y_{22+}$ ,  $Y_{22-}$ ,  $Y_{21+}$ ,  $Y_{21-}$ ,  $Y_{20}$ . Octupoles:  $Y_{33+}$ ,  $Y_{33-}$ ,  $Y_{32+}$ ,  $Y_{32-}$ ,  $Y_{31+}$ ,  $Y_{31-}$ ,  $Y_{30}$ . Hexadecapoles:  $Y_{44+}$ ,  $Y_{44-}$ ,  $Y_{43+}$ ,  $Y_{43-}$ ,  $Y_{42+}$ ,  $Y_{42-}$ ,  $Y_{41+}$ ,  $Y_{41-}$ ,  $Y_{40}$ .

|        |    |    |   |    |        |    |        |    |        |    |        |    |        |    |        |
|--------|----|----|---|----|--------|----|--------|----|--------|----|--------|----|--------|----|--------|
| POPVAL | CL | 1  | 0 | 1  | 1.966  | 2  | 7.928  | 3  | 7.371  | 4  | -0.093 | 5  | 0.010  | 6  | -0.083 |
| POPVAL | CL | 1  | 1 | 7  | -0.173 | 8  | 0.059  | 9  | -0.550 | 10 | 0.052  | 11 | -0.210 | 12 | -0.032 |
| POPVAL | CL | 1  | 2 | 13 | -0.501 | 14 | 0.767  | 15 | -0.157 | 16 | 0.215  | 17 | -0.037 | 18 | -0.162 |
| POPVAL | CL | 1  | 3 | 19 | 0.520  | 20 | -0.943 | 21 | -2.512 | 22 | -2.397 | 23 | 0.547  | 24 | -0.216 |
| POPVAL | CL | 1  | 4 | 25 | 0.087  | 26 | -0.046 | 27 | -0.209 |    |        |    |        |    |        |
| POPVAL | F  | 1  | 0 | 1  | 1.966  | 2  | 0.000  | 3  | 7.049  | 4  | -0.043 | 5  | 0.052  | 6  | 0.050  |
| POPVAL | F  | 1  | 1 | 7  | 0.023  | 8  | -0.078 | 9  | 0.157  | 10 | -0.003 | 11 | 0.001  | 12 | -0.002 |
| POPVAL | F  | 1  | 2 | 13 | -0.047 | 14 | 0.009  | 15 | -0.005 | 16 | 0.008  | 17 | -0.020 | 18 | 0.007  |
| POPVAL | F  | 1  | 3 | 19 | 0.012  | 20 | 0.038  | 21 | -0.122 | 22 | -0.045 | 23 | 0.013  | 24 | 0.023  |
| POPVAL | F  | 1  | 4 | 25 | -0.004 | 26 | -0.015 | 27 | -0.005 |    |        |    |        |    |        |
| POPVAL | N  | 1  | 0 | 1  | 1.966  | 2  | 0.000  | 3  | 5.056  | 4  | 0.184  | 5  | 0.270  | 6  | 0.207  |
| POPVAL | N  | 1  | 1 | 7  | -0.192 | 8  | 0.063  | 9  | -0.290 | 10 | 0.005  | 11 | -0.222 | 12 | -0.163 |
| POPVAL | N  | 1  | 2 | 13 | 0.057  | 14 | -0.604 | 15 | 1.021  | 16 | -0.091 | 17 | 0.083  | 18 | 0.039  |
| POPVAL | N  | 1  | 3 | 19 | 0.099  | 20 | 0.824  | 21 | -0.803 | 22 | -0.293 | 23 | -0.037 | 24 | 0.120  |
| POPVAL | N  | 1  | 4 | 25 | -0.014 | 26 | -0.045 | 27 | -0.020 |    |        |    |        |    |        |
| POPVAL | N  | 2  | 0 | 1  | 1.966  | 2  | 0.000  | 3  | 5.095  | 4  | -0.062 | 5  | -0.010 | 6  | 0.055  |
| POPVAL | N  | 2  | 1 | 7  | 0.073  | 8  | 0.027  | 9  | -0.072 | 10 | 0.027  | 11 | 0.053  | 12 | -0.357 |
| POPVAL | N  | 2  | 2 | 13 | 0.209  | 14 | -1.105 | 15 | 0.988  | 16 | -0.142 | 17 | 0.139  | 18 | -0.056 |
| POPVAL | N  | 2  | 3 | 19 | 0.076  | 20 | -0.223 | 21 | -0.737 | 22 | -0.593 | 23 | 0.053  | 24 | 0.239  |
| POPVAL | N  | 2  | 4 | 25 | -0.162 | 26 | 0.037  | 27 | -0.024 |    |        |    |        |    |        |
| POPVAL | C  | 1  | 0 | 1  | 1.966  | 2  | 0.000  | 3  | 4.117  | 4  | -0.057 | 5  | 0.083  | 6  | 0.096  |
| POPVAL | C  | 1  | 1 | 7  | -0.405 | 8  | -0.577 | 9  | 1.631  | 10 | -0.043 | 11 | -0.608 | 12 | 1.642  |
| POPVAL | C  | 1  | 2 | 13 | -0.846 | 14 | 6.050  | 15 | -4.318 | 16 | 0.885  | 17 | -0.526 | 18 | 0.517  |
| POPVAL | C  | 1  | 3 | 19 | 0.310  | 20 | 2.332  | 21 | -5.847 | 22 | 0.590  | 23 | -0.081 | 24 | 0.328  |
| POPVAL | C  | 1  | 4 | 25 | -0.385 | 26 | 0.781  | 27 | -0.523 |    |        |    |        |    |        |
| POPVAL | C  | 2  | 0 | 1  | 1.966  | 2  | 0.000  | 3  | 4.201  | 4  | 0.159  | 5  | -0.139 | 6  | 0.124  |
| POPVAL | C  | 2  | 1 | 7  | 0.324  | 8  | 0.812  | 9  | -0.031 | 10 | -1.055 | 11 | 0.300  | 12 | -0.055 |
| POPVAL | C  | 2  | 2 | 13 | 0.585  | 14 | -2.937 | 15 | 0.450  | 16 | -1.240 | 17 | -0.699 | 18 | 0.270  |
| POPVAL | C  | 2  | 3 | 19 | -1.761 | 20 | 4.065  | 21 | 0.905  | 22 | -3.653 | 23 | -0.374 | 24 | -0.143 |
| POPVAL | C  | 2  | 4 | 25 | 0.644  | 26 | -1.098 | 27 | -0.513 |    |        |    |        |    |        |
| POPVAL | C  | 3  | 0 | 1  | 1.966  | 2  | 0.000  | 3  | 4.025  | 4  | 0.144  | 5  | -0.050 | 6  | 0.061  |
| POPVAL | C  | 3  | 1 | 7  | 0.615  | 8  | 0.934  | 9  | 0.730  | 10 | -1.084 | 11 | 0.177  | 12 | 0.283  |
| POPVAL | C  | 3  | 2 | 13 | -1.737 | 14 | 4.010  | 15 | 0.974  | 16 | 1.144  | 17 | 0.743  | 18 | -0.681 |
| POPVAL | C  | 3  | 3 | 19 | -0.427 | 20 | 1.223  | 21 | 1.743  | 22 | -0.334 | 23 | 0.821  | 24 | -0.887 |
| POPVAL | C  | 3  | 4 | 25 | 0.085  | 26 | 0.861  | 27 | 0.171  |    |        |    |        |    |        |
| POPVAL | C  | 4  | 0 | 1  | 1.966  | 2  | 0.000  | 3  | 3.999  | 4  | 0.098  | 5  | -0.047 | 6  | 0.074  |
| POPVAL | C  | 4  | 1 | 7  | 0.494  | 8  | 0.894  | 9  | 0.533  | 10 | -1.228 | 11 | -0.021 | 12 | 0.116  |
| POPVAL | C  | 4  | 2 | 13 | 0.704  | 14 | -2.970 | 15 | 0.632  | 16 | -1.086 | 17 | -1.078 | 18 | 0.522  |
| POPVAL | C  | 4  | 3 | 19 | -1.153 | 20 | -1.133 | 21 | -0.805 | 22 | 0.500  | 23 | -1.301 | 24 | -0.631 |
| POPVAL | C  | 4  | 4 | 25 | 0.799  | 26 | -0.119 | 27 | -0.741 |    |        |    |        |    |        |
| POPVAL | C  | 5  | 0 | 1  | 1.966  | 2  | 0.000  | 3  | 4.075  | 4  | 0.041  | 5  | -0.100 | 6  | -0.053 |
| POPVAL | C  | 5  | 1 | 7  | 0.406  | 8  | 1.073  | 9  | 0.506  | 10 | -1.137 | 11 | 0.253  | 12 | 0.373  |
| POPVAL | C  | 5  | 2 | 13 | -1.116 | 14 | 4.225  | 15 | -0.022 | 16 | 1.318  | 17 | 0.731  | 18 | -0.813 |
| POPVAL | C  | 5  | 3 | 19 | -1.531 | 20 | 5.199  | 21 | -2.107 | 22 | 2.561  | 23 | 0.008  | 24 | -0.892 |
| POPVAL | C  | 5  | 4 | 25 | -0.754 | 26 | -0.364 | 27 | 0.474  |    |        |    |        |    |        |
| POPVAL | C  | 6  | 0 | 1  | 1.966  | 2  | 0.000  | 3  | 4.061  | 4  | 0.103  | 5  | 0.055  | 6  | 0.062  |
| POPVAL | C  | 6  | 1 | 7  | 0.374  | 8  | 0.987  | 9  | 0.606  | 10 | -1.121 | 11 | 0.550  | 12 | -0.202 |
| POPVAL | C  | 6  | 2 | 13 | 1.314  | 14 | -2.822 | 15 | -1.115 | 16 | -1.206 | 17 | -0.693 | 18 | 0.481  |
| POPVAL | C  | 6  | 3 | 19 | -0.636 | 20 | 2.742  | 21 | 0.233  | 22 | -2.796 | 23 | -0.744 | 24 | 0.454  |
| POPVAL | C  | 6  | 4 | 25 | 1.111  | 26 | -0.741 | 27 | -1.434 |    |        |    |        |    |        |
| POPVAL | C  | 7  | 0 | 1  | 1.966  | 2  | 0.000  | 3  | 4.066  | 4  | 0.011  | 5  | -0.263 | 6  | 0.148  |
| POPVAL | C  | 7  | 1 | 7  | 0.418  | 8  | 0.687  | 9  | 0.738  | 10 | -1.009 | 11 | 0.258  | 12 | -0.004 |
| POPVAL | C  | 7  | 2 | 13 | -1.010 | 14 | 3.310  | 15 | -1.042 | 16 | 1.336  | 17 | 1.030  | 18 | -0.647 |
| POPVAL | C  | 7  | 3 | 19 | -0.193 | 20 | 0.747  | 21 | 0.355  | 22 | -3.941 | 23 | -0.090 | 24 | 1.600  |
| POPVAL | C  | 7  | 4 | 25 | -1.126 | 26 | -1.340 | 27 | -1.349 |    |        |    |        |    |        |
| POPVAL | C  | 8  | 0 | 1  | 1.966  | 2  | 0.000  | 3  | 4.039  | 4  | -0.098 | 5  | -0.393 | 6  | 0.185  |
| POPVAL | C  | 8  | 1 | 7  | 0.395  | 8  | 0.219  | 9  | 0.118  | 10 | -0.251 | 11 | -1.301 | 12 | 0.985  |
| POPVAL | C  | 8  | 2 | 13 | -2.625 | 14 | 0.832  | 15 | 1.689  | 16 | 0.320  | 17 | -0.179 | 18 | 0.028  |
| POPVAL | C  | 8  | 3 | 19 | 0.931  | 20 | 1.833  | 21 | -3.839 | 22 | 0.864  | 23 | 0.008  | 24 | -0.210 |
| POPVAL | C  | 8  | 4 | 25 | 0.533  | 26 | -0.994 | 27 | 0.274  |    |        |    |        |    |        |
| POPVAL | C  | 9  | 0 | 1  | 1.966  | 2  | 0.000  | 3  | 4.012  | 4  | -0.158 | 5  | -0.163 | 6  | 0.096  |
| POPVAL | C  | 9  | 1 | 7  | -0.045 | 8  | -0.086 | 9  | -0.082 | 10 | -0.480 | 11 | -1.298 | 12 | -1.301 |
| POPVAL | C  | 9  | 2 | 13 | 2.274  | 14 | -0.654 | 15 | 1.239  | 16 | -0.021 | 17 | -0.158 | 18 | -0.069 |
| POPVAL | C  | 9  | 3 | 19 | -0.007 | 20 | 2.711  | 21 | -2.338 | 22 | -0.676 | 23 | -0.402 | 24 | 0.673  |
| POPVAL | C  | 9  | 4 | 25 | -1.113 | 26 | 0.586  | 27 | 0.468  |    |        |    |        |    |        |
| POPVAL | C  | 10 | 0 | 1  | 1.966  | 2  | 0.000  | 3  | 4.026  | 4  | -0.193 | 5  | -0.042 | 6  | 0.015  |
| POPVAL | C  | 10 | 1 | 7  | 0.104  | 8  | 0.148  | 9  | -0.079 | 10 | -0.328 | 11 | -1.544 | 12 | 0.761  |

Table S2, box 2 continued

|           |    |   |    |        |    |        |    |        |    |        |    |        |    |        |
|-----------|----|---|----|--------|----|--------|----|--------|----|--------|----|--------|----|--------|
| POPVAL C  | 10 | 2 | 13 | -2.765 | 14 | 0.041  | 15 | 1.989  | 16 | -0.240 | 17 | 0.427  | 18 | 0.069  |
| POPVAL C  | 10 | 3 | 19 | -0.185 | 20 | 1.310  | 21 | -4.909 | 22 | -3.914 | 23 | -0.227 | 24 | 0.684  |
| POPVAL C  | 10 | 4 | 25 | -0.493 | 26 | 0.025  | 27 | 1.672  |    |        |    |        |    |        |
| POPVAL C  | 11 | 0 | 1  | 1.966  | 2  | 0.000  | 3  | 4.110  | 4  | -0.086 | 5  | 0.322  | 6  | -0.008 |
| POPVAL C  | 11 | 1 | 7  | 0.769  | 8  | 0.264  | 9  | 0.004  | 10 | 0.097  | 11 | -1.194 | 12 | -1.475 |
| POPVAL C  | 11 | 2 | 13 | 2.626  | 14 | -0.232 | 15 | -0.793 | 16 | 0.325  | 17 | 0.609  | 18 | -0.271 |
| POPVAL C  | 11 | 3 | 19 | 1.532  | 20 | 6.286  | 21 | -3.035 | 22 | -1.629 | 23 | 0.456  | 24 | 1.285  |
| POPVAL C  | 11 | 4 | 25 | -0.110 | 26 | -1.064 | 27 | 0.472  |    |        |    |        |    |        |
| POPVAL C  | 12 | 0 | 1  | 1.966  | 2  | 0.000  | 3  | 4.002  | 4  | -0.015 | 5  | 0.047  | 6  | -0.081 |
| POPVAL C  | 12 | 1 | 7  | -0.076 | 8  | 0.127  | 9  | 0.032  | 10 | -0.136 | 11 | -1.114 | 12 | 1.138  |
| POPVAL C  | 12 | 2 | 13 | -2.525 | 14 | 0.827  | 15 | 1.533  | 16 | 0.268  | 17 | 0.334  | 18 | -0.075 |
| POPVAL C  | 12 | 3 | 19 | -0.142 | 20 | -2.342 | 21 | -2.430 | 22 | -2.381 | 23 | 0.325  | 24 | -1.339 |
| POPVAL C  | 12 | 4 | 25 | 0.960  | 26 | 2.146  | 27 | -0.796 |    |        |    |        |    |        |
| POPVAL C  | 13 | 0 | 1  | 1.966  | 2  | 0.000  | 3  | 4.082  | 4  | 0.000  | 5  | -0.263 | 6  | 0.089  |
| POPVAL C  | 13 | 1 | 7  | -0.049 | 8  | -0.002 | 9  | -0.026 | 10 | -0.495 | 11 | -1.354 | 12 | -1.169 |
| POPVAL C  | 13 | 2 | 13 | 2.295  | 14 | -1.062 | 15 | 0.676  | 16 | 0.237  | 17 | 0.048  | 18 | -0.182 |
| POPVAL C  | 13 | 3 | 19 | -0.119 | 20 | 3.339  | 21 | -1.076 | 22 | -3.635 | 23 | -0.723 | 24 | 0.308  |
| POPVAL C  | 13 | 4 | 25 | -0.955 | 26 | -0.412 | 27 | 0.516  |    |        |    |        |    |        |
| POPVAL HH | 3  | 0 | 1  | 0.000  | 2  | 0.000  | 3  | 0.919  | 4  | 0.521  | 5  | 0.123  | 6  | -0.141 |
| POPVAL HH | 3  | 1 | 7  | 0.616  | 8  | 0.804  | 9  | -0.387 | 10 | -0.316 | 11 | -0.610 | 12 | 0.000  |
| POPVAL HH | 3  | 2 | 13 | 0.000  | 14 | 0.000  | 15 | 0.000  | 16 | 0.000  | 17 | 0.000  | 18 | 0.000  |
| POPVAL HH | 3  | 3 | 19 | 0.000  | 20 | 0.000  | 21 | 0.000  | 22 | 0.000  | 23 | 0.000  | 24 | 0.000  |
| POPVAL HH | 3  | 4 | 25 | 0.000  | 26 | 0.000  | 27 | 0.000  |    |        |    |        |    |        |
| POPVAL HH | 4  | 0 | 1  | 0.000  | 2  | 0.000  | 3  | 0.909  | 4  | 0.259  | 5  | -0.053 | 6  | -0.804 |
| POPVAL HH | 4  | 1 | 7  | -0.030 | 8  | 0.974  | 9  | -0.045 | 10 | -0.361 | 11 | 0.909  | 12 | 0.000  |
| POPVAL HH | 4  | 2 | 13 | 0.000  | 14 | 0.000  | 15 | 0.000  | 16 | 0.000  | 17 | 0.000  | 18 | 0.000  |
| POPVAL HH | 4  | 3 | 19 | 0.000  | 20 | 0.000  | 21 | 0.000  | 22 | 0.000  | 23 | 0.000  | 24 | 0.000  |
| POPVAL HH | 4  | 4 | 25 | 0.000  | 26 | 0.000  | 27 | 0.000  |    |        |    |        |    |        |
| POPVAL HH | 5  | 0 | 1  | 0.000  | 2  | 0.000  | 3  | 0.952  | 4  | -0.482 | 5  | 0.006  | 6  | -0.306 |
| POPVAL HH | 5  | 1 | 7  | 0.314  | 8  | -0.989 | 9  | 1.257  | 10 | -0.884 | 11 | -0.486 | 12 | 0.000  |
| POPVAL HH | 5  | 2 | 13 | 0.000  | 14 | 0.000  | 15 | 0.000  | 16 | 0.000  | 17 | 0.000  | 18 | 0.000  |
| POPVAL HH | 5  | 3 | 19 | 0.000  | 20 | 0.000  | 21 | 0.000  | 22 | 0.000  | 23 | 0.000  | 24 | 0.000  |
| POPVAL HH | 5  | 4 | 25 | 0.000  | 26 | 0.000  | 27 | 0.000  |    |        |    |        |    |        |
| POPVAL HH | 6  | 0 | 1  | 0.000  | 2  | 0.000  | 3  | 0.944  | 4  | -0.402 | 5  | -0.216 | 6  | 0.248  |
| POPVAL HH | 6  | 1 | 7  | -0.043 | 8  | 0.200  | 9  | -0.078 | 10 | -0.033 | 11 | -0.457 | 12 | 0.000  |
| POPVAL HH | 6  | 2 | 13 | 0.000  | 14 | 0.000  | 15 | 0.000  | 16 | 0.000  | 17 | 0.000  | 18 | 0.000  |
| POPVAL HH | 6  | 3 | 19 | 0.000  | 20 | 0.000  | 21 | 0.000  | 22 | 0.000  | 23 | 0.000  | 24 | 0.000  |
| POPVAL HH | 6  | 4 | 25 | 0.000  | 26 | 0.000  | 27 | 0.000  |    |        |    |        |    |        |
| POPVAL HH | 7  | 0 | 1  | 0.000  | 2  | 0.000  | 3  | 0.968  | 4  | -0.251 | 5  | -0.543 | 6  | 0.501  |
| POPVAL HH | 7  | 1 | 7  | -0.279 | 8  | 0.092  | 9  | -1.222 | 10 | -0.574 | 11 | 1.201  | 12 | 0.000  |
| POPVAL HH | 7  | 2 | 13 | 0.000  | 14 | 0.000  | 15 | 0.000  | 16 | 0.000  | 17 | 0.000  | 18 | 0.000  |
| POPVAL HH | 7  | 3 | 19 | 0.000  | 20 | 0.000  | 21 | 0.000  | 22 | 0.000  | 23 | 0.000  | 24 | 0.000  |
| POPVAL HH | 7  | 4 | 25 | 0.000  | 26 | 0.000  | 27 | 0.000  |    |        |    |        |    |        |
| POPVAL HH | 9  | 0 | 1  | 0.000  | 2  | 0.000  | 3  | 0.944  | 4  | -0.674 | 5  | -0.428 | 6  | -0.187 |
| POPVAL HH | 9  | 1 | 7  | 0.186  | 8  | -0.077 | 9  | 0.836  | 10 | 0.349  | 11 | -0.903 | 12 | 0.000  |
| POPVAL HH | 9  | 2 | 13 | 0.000  | 14 | 0.000  | 15 | 0.000  | 16 | 0.000  | 17 | 0.000  | 18 | 0.000  |
| POPVAL HH | 9  | 3 | 19 | 0.000  | 20 | 0.000  | 21 | 0.000  | 22 | 0.000  | 23 | 0.000  | 24 | 0.000  |
| POPVAL HH | 9  | 4 | 25 | 0.000  | 26 | 0.000  | 27 | 0.000  |    |        |    |        |    |        |
| POPVAL HH | 10 | 0 | 1  | 0.000  | 2  | 0.000  | 3  | 0.902  | 4  | -0.431 | 5  | 0.371  | 6  | -0.091 |
| POPVAL HH | 10 | 1 | 7  | 0.389  | 8  | -1.173 | 9  | -0.039 | 10 | 1.017  | 11 | -0.357 | 12 | 0.000  |
| POPVAL HH | 10 | 2 | 13 | 0.000  | 14 | 0.000  | 15 | 0.000  | 16 | 0.000  | 17 | 0.000  | 18 | 0.000  |
| POPVAL HH | 10 | 3 | 19 | 0.000  | 20 | 0.000  | 21 | 0.000  | 22 | 0.000  | 23 | 0.000  | 24 | 0.000  |
| POPVAL HH | 10 | 4 | 25 | 0.000  | 26 | 0.000  | 27 | 0.000  |    |        |    |        |    |        |
| POPVAL HH | 12 | 0 | 1  | 0.000  | 2  | 0.000  | 3  | 0.946  | 4  | 0.695  | 5  | -0.006 | 6  | -0.019 |
| POPVAL HH | 12 | 1 | 7  | 0.209  | 8  | 1.015  | 9  | 0.068  | 10 | -0.451 | 11 | -0.424 | 12 | 0.000  |
| POPVAL HH | 12 | 2 | 13 | 0.000  | 14 | 0.000  | 15 | 0.000  | 16 | 0.000  | 17 | 0.000  | 18 | 0.000  |
| POPVAL HH | 12 | 3 | 19 | 0.000  | 20 | 0.000  | 21 | 0.000  | 22 | 0.000  | 23 | 0.000  | 24 | 0.000  |
| POPVAL HH | 12 | 4 | 25 | 0.000  | 26 | 0.000  | 27 | 0.000  |    |        |    |        |    |        |
| POPVAL HH | 13 | 0 | 1  | 0.000  | 2  | 0.000  | 3  | 0.968  | 4  | 0.608  | 5  | -0.201 | 6  | 0.153  |
| POPVAL HH | 13 | 1 | 7  | 0.255  | 8  | -0.711 | 9  | 0.304  | 10 | 0.404  | 11 | -0.550 | 12 | 0.000  |
| POPVAL HH | 13 | 2 | 13 | 0.000  | 14 | 0.000  | 15 | 0.000  | 16 | 0.000  | 17 | 0.000  | 18 | 0.000  |
| POPVAL HH | 13 | 3 | 19 | 0.000  | 20 | 0.000  | 21 | 0.000  | 22 | 0.000  | 23 | 0.000  | 24 | 0.000  |
| POPVAL HH | 13 | 4 | 25 | 0.000  | 26 | 0.000  | 27 | 0.000  |    |        |    |        |    |        |
| POPVAL HH | 2N | 0 | 1  | 0.000  | 2  | 0.000  | 3  | 0.754  | 4  | 0.543  | 5  | 0.055  | 6  | 0.337  |
| POPVAL HH | 2N | 1 | 7  | 0.503  | 8  | -0.488 | 9  | 0.615  | 10 | 0.392  | 11 | -0.061 | 12 | 0.000  |
| POPVAL HH | 2N | 2 | 13 | 0.000  | 14 | 0.000  | 15 | 0.000  | 16 | 0.000  | 17 | 0.000  | 18 | 0.000  |
| POPVAL HH | 2N | 3 | 19 | 0.000  | 20 | 0.000  | 21 | 0.000  | 22 | 0.000  | 23 | 0.000  | 24 | 0.000  |
| POPVAL HH | 2N | 4 | 25 | 0.000  | 26 | 0.000  | 27 | 0.000  |    |        |    |        |    |        |

Box 3: For each atom, radial parameters ( $\text{\AA}^{-1}$ ) from  $l = 0$  to  $l = 4$

|        |    |    |       |   |   |       |   |   |       |   |   |       |   |   |       |   |   |
|--------|----|----|-------|---|---|-------|---|---|-------|---|---|-------|---|---|-------|---|---|
| RADPRM | CL | 1  | 1.005 | 0 | 3 | 3.610 | 2 | 1 | 3.610 | 2 | 1 | 3.610 | 3 | 1 | 3.610 | 4 | 1 |
| RADPRM | F  | 1  | 0.994 | 0 | 3 | 5.777 | 2 | 1 | 5.777 | 2 | 1 | 5.777 | 3 | 1 | 5.777 | 4 | 1 |
| RADPRM | N  | 1  | 0.985 | 0 | 3 | 3.950 | 2 | 1 | 3.950 | 2 | 1 | 3.950 | 3 | 1 | 3.950 | 4 | 1 |
| RADPRM | N  | 2  | 0.985 | 0 | 3 | 3.950 | 2 | 1 | 3.950 | 2 | 1 | 3.950 | 3 | 1 | 3.950 | 4 | 1 |
| RADPRM | C  | 1  | 0.996 | 0 | 3 | 2.961 | 2 | 1 | 2.961 | 2 | 1 | 2.961 | 3 | 1 | 2.961 | 4 | 1 |
| RADPRM | C  | 2  | 0.996 | 0 | 3 | 2.961 | 2 | 1 | 2.961 | 2 | 1 | 2.961 | 3 | 1 | 2.961 | 4 | 1 |
| RADPRM | C  | 3  | 0.996 | 0 | 3 | 2.961 | 2 | 1 | 2.961 | 2 | 1 | 2.961 | 3 | 1 | 2.961 | 4 | 1 |
| RADPRM | C  | 4  | 0.996 | 0 | 3 | 2.961 | 2 | 1 | 2.961 | 2 | 1 | 2.961 | 3 | 1 | 2.961 | 4 | 1 |
| RADPRM | C  | 5  | 0.996 | 0 | 3 | 2.961 | 2 | 1 | 2.961 | 2 | 1 | 2.961 | 3 | 1 | 2.961 | 4 | 1 |
| RADPRM | C  | 6  | 0.996 | 0 | 3 | 2.961 | 2 | 1 | 2.961 | 2 | 1 | 2.961 | 3 | 1 | 2.961 | 4 | 1 |
| RADPRM | C  | 7  | 0.996 | 0 | 3 | 2.961 | 2 | 1 | 2.961 | 2 | 1 | 2.961 | 3 | 1 | 2.961 | 4 | 1 |
| RADPRM | C  | 8  | 0.996 | 0 | 3 | 2.961 | 2 | 1 | 2.961 | 2 | 1 | 2.961 | 3 | 1 | 2.961 | 4 | 1 |
| RADPRM | C  | 9  | 0.996 | 0 | 3 | 2.961 | 2 | 1 | 2.961 | 2 | 1 | 2.961 | 3 | 1 | 2.961 | 4 | 1 |
| RADPRM | C  | 10 | 0.996 | 0 | 3 | 2.961 | 2 | 1 | 2.961 | 2 | 1 | 2.961 | 3 | 1 | 2.961 | 4 | 1 |
| RADPRM | C  | 11 | 0.996 | 0 | 3 | 2.961 | 2 | 1 | 2.961 | 2 | 1 | 2.961 | 3 | 1 | 2.961 | 4 | 1 |
| RADPRM | C  | 12 | 0.996 | 0 | 3 | 2.961 | 2 | 1 | 2.961 | 2 | 1 | 2.961 | 3 | 1 | 2.961 | 4 | 1 |
| RADPRM | C  | 13 | 0.996 | 0 | 3 | 2.961 | 2 | 1 | 2.961 | 2 | 1 | 2.961 | 3 | 1 | 2.961 | 4 | 1 |
| RADPRM | HH | 3  | 2.259 | 0 | 1 | 2.259 | 1 | 1 | 2.259 | 2 | 1 |       |   |   |       |   |   |
| RADPRM | HH | 4  | 2.259 | 0 | 1 | 2.259 | 1 | 1 | 2.259 | 2 | 1 |       |   |   |       |   |   |
| RADPRM | HH | 5  | 2.259 | 0 | 1 | 2.259 | 1 | 1 | 2.259 | 2 | 1 |       |   |   |       |   |   |
| RADPRM | HH | 6  | 2.259 | 0 | 1 | 2.259 | 1 | 1 | 2.259 | 2 | 1 |       |   |   |       |   |   |
| RADPRM | HH | 7  | 2.259 | 0 | 1 | 2.259 | 1 | 1 | 2.259 | 2 | 1 |       |   |   |       |   |   |
| RADPRM | HH | 9  | 2.259 | 0 | 1 | 2.259 | 1 | 1 | 2.259 | 2 | 1 |       |   |   |       |   |   |
| RADPRM | HH | 10 | 2.259 | 0 | 1 | 2.259 | 1 | 1 | 2.259 | 2 | 1 |       |   |   |       |   |   |
| RADPRM | HH | 12 | 2.259 | 0 | 1 | 2.259 | 1 | 1 | 2.259 | 2 | 1 |       |   |   |       |   |   |
| RADPRM | HH | 13 | 2.259 | 0 | 1 | 2.259 | 1 | 1 | 2.259 | 2 | 1 |       |   |   |       |   |   |
| RADPRM | HH | 2N | 2.405 | 0 | 1 | 2.405 | 1 | 1 | 2.405 | 2 | 1 |       |   |   |       |   |   |

Box 4: high order cumulants ( $\times 10^4$ ) on Cl and F as follows. 3<sup>rd</sup> order: C<sub>111</sub>, C<sub>112</sub>, C<sub>122</sub>, C<sub>113</sub>, C<sub>123</sub>, C<sub>133</sub>, C<sub>222</sub>, C<sub>223</sub>, C<sub>233</sub>, C<sub>333</sub>; 4<sup>th</sup> order: D<sub>1111</sub>, D<sub>1112</sub>, D<sub>1122</sub>, D<sub>1113</sub>, D<sub>1123</sub>, D<sub>1133</sub>, D<sub>1222</sub>, D<sub>1223</sub>, D<sub>1233</sub>, D<sub>1333</sub>, D<sub>2222</sub>, D<sub>2223</sub>, D<sub>2233</sub>, D<sub>2333</sub>, D<sub>3333</sub>.

|        |    |   |   |          |          |          |          |          |
|--------|----|---|---|----------|----------|----------|----------|----------|
| CUMCOF | CL | 1 | 4 | 0.00024  | -0.00869 | -0.01700 | 0.01241  | 0.06060  |
| CUMCOF |    |   |   | -0.00680 | -0.01837 | 0.03570  | 0.00169  | 0.01507  |
| CUMCOF |    |   |   | 0.00080  | -0.00030 | -0.00131 | -0.00115 | 0.00346  |
| CUMCOF |    |   |   | 0.00515  | -0.00292 | 0.00859  | 0.00343  | 0.00005  |
| CUMCOF |    |   |   | -0.00118 | 0.00244  | 0.00434  | 0.00100  | 0.00096  |
| CUMCOF | F  | 1 | 4 | 0.00785  | -0.07838 | -0.14336 | -0.01212 | 0.12579  |
| CUMCOF |    |   |   | 0.08770  | -0.14450 | 0.02494  | 0.03217  | -0.05392 |
| CUMCOF |    |   |   | 0.01471  | 0.02535  | 0.02052  | -0.01434 | -0.00782 |
| CUMCOF |    |   |   | 0.02139  | 0.00697  | -0.00083 | 0.01793  | -0.00691 |
| CUMCOF |    |   |   | -0.00368 | 0.00499  | 0.00337  | 0.00611  | 0.00584  |

## S7. Bond lengths

### S7.1 Experimental and theoretical geometries and convergence of the basis set

The pob-TZVP-rev2 triple-zeta valence + polarization basis set designed by Peintinger, Oliveira and Bredow for the computation of solid-state systems,<sup>7,8</sup> combined with the PBE0 hybrid density functional,<sup>9</sup> was used to calculate the equilibrium crystalline geometry of NCLBA with the code CRYSTAL17.<sup>10</sup> The most relevant geometric parameter is undoubtedly the length of the N-Cl bond, whose value could be closely related to the well-known lability of the bond itself. The calculated value of this parameter, 1.816 Å, overestimates the experimental value by 0.067 Å (3.8%). In order to explain this discrepancy, it may be useful to study the convergence properties of the basis set with respect to the value of  $R_{N-Cl}$ . As this cannot be done by periodic ab initio methods due to the excessive computational effort required, we focused on computation of the equilibrium geometry and electrostatic properties of the NCLBA molecule in vacuum. The pob-TZVP-rev2 basis set is based on the def2-TZVP basis set developed for molecules by the Ahlrichs group.<sup>11</sup> For this reason and in order to consistently and reliably compare the equilibrium geometries of NCLBA in the solid state and in the vacuum, the equilibrium geometry and dipole moment of the NCLBA molecule in vacuum were calculated using the def2-TZVP basis set together with the PBE0 density functional.

**Table S3** - N-Cl equilibrium distance and dipole moment for the N-chloro-N'-(4-fluoro-phenyl)-benzamidine (NCLBA) molecule in vacuum.

| basis set |                    | M <sup>†</sup> | density functional |           |                |           |
|-----------|--------------------|----------------|--------------------|-----------|----------------|-----------|
|           |                    |                | PBE0               |           | B3LYP          |           |
|           |                    |                | $R_{N-Cl}$ (Å)     | $\mu$ (D) | $R_{N-Cl}$ (Å) | $\mu$ (D) |
| A5        | def2-aug-TZVPP     | 1321           | 1.7219             | 2.338     | 1.7545         | 2.422     |
| A4        | def2-aug-TZVPP(-f) | 1083           | 1.7322             | 2.458     | 1.7652         | 2.544     |
| A3        | def2-TZVP          | 879            | 1.7224             | 2.338     | 1.7545         | 2.387     |
| A2        | def2-TZVP(-f)      | 760            | 1.7335             | 2.376     | 1.7670         | 2.439     |
| A1        | pob-TZVP-rev2      | 651            | 1.8052             | 2.484     | 1.8398         | 2.530     |
| B5        | 6-311++G(3df,3pd)  | 1101           | 1.7205             | 2.346     | 1.7514         | 2.400     |
| B4        | 6-311G(3df,3pd)    | 1023           | 1.7220             | 2.534     | 1.7543         | 2.635     |
| B3        | 6-311++G(2d,2p)    | 817            | 1.7405             | 2.457     | 1.7330         | 2.529     |
| B2        | 6-311G(2d,2p)      | 739            | 1.7457             | 2.712     | 1.7812         | 2.833     |
| B1        | 6-311G(d,p)        | 624            | 1.7533             | 2.741     | 1.7904         | 2.868     |
| C1        | aug-pc-1           | 780            | 1.7571             | 2.530     | 1.7914         | 2.607     |

<sup>†</sup>Number of primitive gaussian functions.

The convergence properties of the basis set were analyzed by using bases which comprise a different number of primitive functions, such as the pob-TZVP-rev2 itself, the def2-TZVP (-f) which does not contain f functions and the def2-aug-TZVPP which is augmented by diffuse functions and

has 2p1d polarization for hydrogen, together with some of the valence triple-zeta plus polarization Pople basis sets, like 6-311G(d,p) and 6-311++G(2d,2p),<sup>12</sup> and Jensen polarization-consistent basis set, aug-pc-1,<sup>13</sup> which is of double-zeta plus polarization quality augmented by diffuse functions. Calculations were performed with both the PBE0 and the popular B3LYP density functionals.<sup>14-17</sup> The results are summarized in Table S3 and Figures S3-S5, focusing on the equilibrium distance  $R_{N-Cl}$  and the magnitude of the molecular dipole moment.

In addition to the methods reported in Table S3, the B2PLYP double-hybrid functional<sup>18</sup> was also used, combined with the aug-pc-1 basis set, as it was indicated as one of the theoretical models that can provide an excellent compromise between accuracy and computational efficiency in the calculation of molecular dipole moments.<sup>19-21</sup> The calculation yielded a value of  $R_{N-Cl} = 1.7901 \text{ \AA}$ , which is practically identical to those obtained with the B3LYP/6-311G(d,p) and B3LYP/aug-pc-1 models, and a value of the molecular dipole moment  $\mu = 2.885 \text{ D}$  that is quite close to the B3LYP/6-311G(d,p) value.

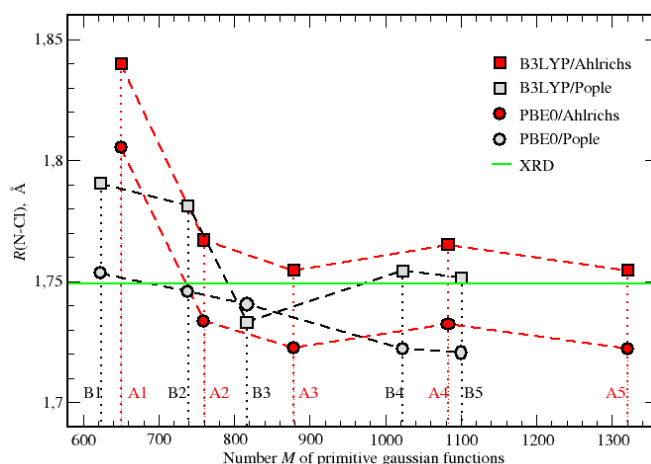

**Figure S3.** Basis set convergence of equilibrium N-Cl bond length of NCLBA in vacuum for two basis set families (Ahlrichs: red symbols, Pople: grey symbols) and two density functionals (B3LYP: squares, PBE0: circles). For each density functional, the dashed lines connect the points belonging to the same basis set family. Vertical dotted lines mark the individual basis sets (A1: pob-TZVP-rev2,  $M = 651$ ; A2: def2-TZVP (-f),  $M = 760$ ; A3: def2-TZVP,  $M = 879$ ; A4: def2-aug-TZVPP(-f),  $M = 1083$ ; A5: def2-aug-TZVPP,  $M = 1321$ ).

As shown in Figure S3, the equilibrium value of  $R_{N-Cl}$  calculated for the NCLBA molecule in vacuum decreases with some oscillations as the number  $M$  of the basis functions increases and eventually reaches a constant value. Both Ahlrichs and Pople families of basis functions, combined with the density functional B3LYP, nicely converge towards the experimental value of  $R_{N-Cl}$ . The PBE0 values follow the same trend as they are linearly correlated to the B3LYP values, as shown in Figure S4. However, they are systematically lower than the B3LYP values by the average amount of

$\Delta R_{av} = 0.0334(16) \text{ \AA}$ , except in the case of the 6-311++G(2d,2p) values which differ slightly by  $-0.0075 \text{ \AA}$  and were not included in the least-squares regression line of Figure S4.

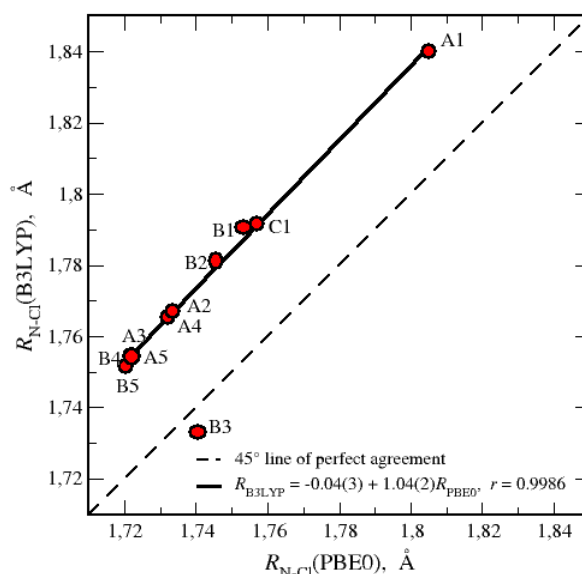

**Figure S4.** Relationship between B3LYP and PBE0 values of the N-Cl equilibrium distance for the basis sets specified in Table S3. Point B3 is not included in the regression line.

In Table S3 and Figure S3 we monitored the trend of  $R_{N-CL}$  values as a function of the extent  $M$  of the basis set. It is clear that for each model (eg PBE0 and B3LYP) and for each family of basis functions (Ahlrichs and Pople) the  $R_{N-CL}$  bond distance tends to a constant value as the size of the basis set increases. This result is not surprising, and it is to be expected that it can be found for all pairs of bonded atoms.

In Table S4, the experimental values (XRD) of the bond lengths in the amidine fragment of NCLBA are compared with the corresponding equilibrium values of the molecule in the crystalline state and in the vacuum, calculated using the functional PBE0 and the basis functions A0 through A5 (with A0 being the periodic equivalent of A1). This is graphically displayed in Figure S5. The linear regression line (red line) shows an almost quantitative agreement ( $r = 0.9994$ ) between calculated and experimental values, slightly deviating from the  $45^\circ$  line of perfect agreement (dotted line) due to a slope of 0.976 (6). There are only two outliers that correspond to the values calculated with the pobTZVP-rev2 basis set in the solid state (black circle, periodic PBE0/A0) and in the gas phase (red square, PBE0/A1); these two points were not included in the linear regression.

**Table S4.** Comparison of the experimental (XRD) geometry of the amidine fragment of NCLBA with the equilibrium geometries calculated in the crystalline state (A0: periodic PBE0/pob-TZVP-*rev2*) and for the molecule in vacuum (using the PBE0 density functional and the following Ahlrichs basis sets A1: pob-TZVP-*rev2*,  $M = 651$ ; A2: def2-TZVP (-f),  $M = 760$ ; A3: def2-TZVP,  $M = 879$ ; A4: def2-aug-TZVPP(-f),  $M = 1083$ ; A5: def2-aug-TZVPP,  $M = 1321$ ).

|                                | XRD       | A0     | A1     | A2     | A3     | A4     | A5     |
|--------------------------------|-----------|--------|--------|--------|--------|--------|--------|
| Bond lengths                   |           |        |        |        |        |        |        |
| N1-C11                         | 1.7490(2) | 1.8162 | 1.8052 | 1.7335 | 1.7224 | 1.7322 | 1.7220 |
| N1-C1                          | 1.3064(2) | 1.3051 | 1.2989 | 1.2927 | 1.2927 | 1.2923 | 1.2927 |
| C1-N2                          | 1.3533(2) | 1.3478 | 1.3617 | 1.3593 | 1.3588 | 1.3602 | 1.3593 |
| C1-C2                          | 1.4893(2) | 1.4827 | 1.4794 | 1.4822 | 1.4822 | 1.4823 | 1.4821 |
| N2-C8                          | 1.4207(2) | 1.4162 | 1.4120 | 1.4074 | 1.4058 | 1.4108 | 1.4066 |
| N2-H2N                         | 1.0143(2) | 1.0176 | 1.0152 | 1.0111 | 1.0110 | 1.0103 | 1.0105 |
| Bond angles                    |           |        |        |        |        |        |        |
| C1-N1-C11                      | 113.24    | 112.64 | 112.18 | 113.96 | 114.30 | 113.89 | 114.25 |
| N1-C1-N2                       | 126.52    | 127.77 | 126.21 | 125.51 | 125.34 | 125.79 | 125.43 |
| N1-C1-C2                       | 112.99    | 111.46 | 113.33 | 114.12 | 114.21 | 114.37 | 114.34 |
| N2-C1-C2                       | 120.47    | 120.71 | 120.33 | 120.20 | 120.29 | 119.67 | 120.10 |
| C1-N2-C8                       | 127.87    | 128.85 | 128.32 | 128.39 | 128.83 | 126.86 | 128.39 |
| C1-N2-H2N                      | 118.50    | 115.99 | 113.59 | 113.34 | 113.48 | 113.71 | 113.58 |
| C8-N2-H2N                      | 113.50    | 115.13 | 117.01 | 116.20 | 116.19 | 116.68 | 116.38 |
| Dihedral angles                |           |        |        |        |        |        |        |
| N2-C1-N1-C11                   | 0.05      | 1.14   | 4.57   | 4.76   | 4.45   | 4.71   | 4.17   |
| H2N-N2-C1-N1                   | 1.54      | 0.86   | 6.62   | 5.83   | 7.16   | 5.05   | 6.69   |
| C2-C1-N1-C11                   | 178.31    | 178.30 | 179.63 | 179.97 | 179.89 | 179.99 | 179.96 |
| C3-C2-C1-N1                    | 118.40    | 120.94 | 134.57 | 135.76 | 135.69 | 134.86 | 134.18 |
| H2N-N2-C8-C9                   | 138.29    | 138.01 | 134.91 | 132.28 | 134.65 | 125.29 | 135.34 |
| Intramolecular short distances |           |        |        |        |        |        |        |
| C11-H2N                        | 2.407     | 2.400  | 2.312  | 2.311  | 2.318  | 2.323  | 2.319  |
| C1-C3                          | 2.509     | 2.493  | 2.496  | 2.498  | 2.499  | 2.493  | 2.497  |
| N2-H3                          | 2.978     | 2.924  | 2.764  | 2.746  | 2.752  | 2.732  | 2.765  |
| C8-H3                          | 2.928     | 2.914  | 2.773  | 2.794  | 2.787  | 2.803  | 2.824  |
| C3-N2                          | 3.120     | 3.081  | 2.997  | 2.987  | 2.991  | 2.975  | 2.995  |
| C8-C2                          | 2.985     | 3.001  | 3.028  | 3.039  | 3.043  | 3.008  | 3.031  |
| C3-C8                          | 3.188     | 3.197  | 3.143  | 3.166  | 3.165  | 3.146  | 3.170  |

The variation coefficient of  $R_{N-C1}$ , calculated for the range of values A2-A5, amounts to 0.31% but increases to 2.26% if the two outliers A0 and A1 are also included. The coefficient of variation relative to the other bond distances reported in Table 2 and calculated for the complete range of values A0-A5, is consistently small: 0.37% (C1-N1), 0.34% (C1-N2), 0.07% (C1-C2), 0.25% (C8-N2), and 0.28% (N2-H2N). These results show that there are no significant differences in the values of the bond lengths passing from the molecule in the crystalline state to the gas phase. The observed discrepancy between the calculated values A0 and A1 and the experimental value of the N-C1 bond length is probably due to the inadequacy of the basis set pob-TZVP-*rev2* in describing such a bond. In addition, this basis set, together with the 6-311G(d, p) one, is among the smallest used in our study ( $M = 651$  and  $624$ , respectively).



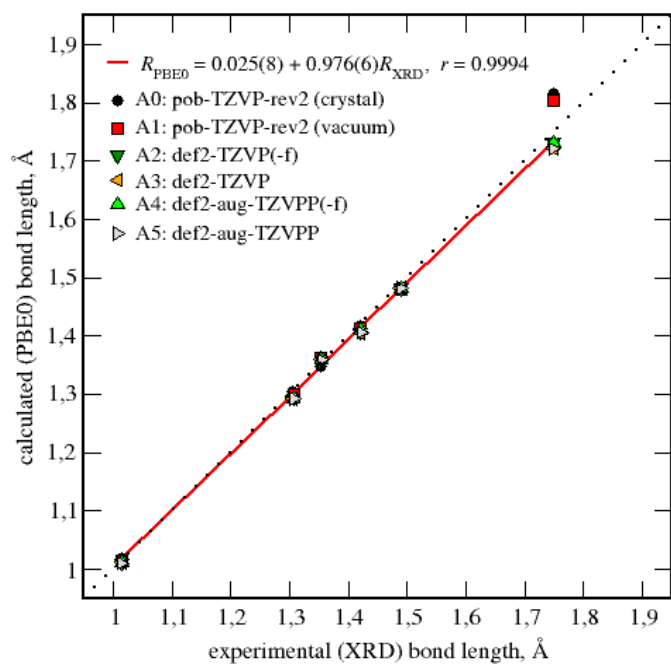

**Figure S5.** Comparison of the experimental values (XRD) of the bond lengths in the amidine fragment of NCLBA and the corresponding equilibrium values of the molecule in the crystalline state and in the vacuum, calculated using the functional PBE0 and the basis functions A0 through A5. The two values of RN-Cl, calculated for the molecule in the crystal (A0, black circle) and in the vacuum (A1, red square) with the pob-TZVP basis set, are not included in the regression.

**Table S5.** Comparison of point topological properties at the N–Cl covalent bond in different organic molecules, as obtained from PBE0/pob-TZVP-*rev2* and D3-Grimme corrected quantum calculations on gas-phase molecules frozen at their in-crystal geometries. Data of N–Cl in NCLBA are highlighted in bold.

| Substance                            | Bond          | Density<br>/ e·Å <sup>-3</sup> | Laplacian<br>/ e·Å <sup>-5</sup> | Ellipt.        | Hessian Eigenvalues / e·Å <sup>-5</sup> |                |                | Bond length<br>/ Å |
|--------------------------------------|---------------|--------------------------------|----------------------------------|----------------|-----------------------------------------|----------------|----------------|--------------------|
|                                      |               |                                |                                  |                | λ <sub>1</sub>                          | λ <sub>2</sub> | λ <sub>3</sub> |                    |
| AZCFOM01                             | C11-N4        | 1.3129                         | -2.70062                         | 0.019          | -6.814                                  | -6.686         | 10.799         | 1.7214             |
| AZCFOM01                             | C16-N9        | 1.3129                         | -2.70198                         | 0.019          | -6.813                                  | -6.685         | 10.797         | 1.7214             |
| ENAJIO                               | N10-C111      | 1.3781                         | -3.91452                         | 0.014          | -6.948                                  | -6.851         | 9.885          | 1.6948             |
| ENAJIO                               | N26-C127      | 1.3776                         | -3.90675                         | 0.014          | -6.946                                  | -6.849         | 9.888          | 1.6950             |
| FEVNUP                               | C11-N10       | 1.2684                         | -2.06948                         | 0.012          | -6.486                                  | -6.407         | 10.824         | 1.7360             |
| GUGREH                               | C11-N3        | 1.2683                         | -2.28459                         | 0.023          | -6.516                                  | -6.370         | 10.601         | 1.7346             |
| NUJJAF                               | N8-C110       | 1.3497                         | -3.30437                         | 0.017          | -6.981                                  | -6.863         | 10.540         | 1.7067             |
| NUXXOV                               | N5-C119       | 1.2881                         | -2.52804                         | 0.019          | -6.633                                  | -6.512         | 10.616         | 1.7286             |
| PASJAV                               | C144-N252     | 1.3346                         | -3.23972                         | 0.011          | -6.798                                  | -6.723         | 10.281         | 1.7099             |
| RAQBIX                               | N141-C116     | 1.2033                         | -1.05024                         | 0.016          | -6.159                                  | -6.064         | 11.173         | 1.7636             |
| SEMHOI                               | N8-C110       | 1.2870                         | -2.54446                         | 0.055          | -6.625                                  | -6.281         | 10.361         | 1.7316             |
| SEMHOI                               | N8-C111       | 1.2399                         | -1.81164                         | 0.060          | -6.420                                  | -6.057         | 10.665         | 1.7500             |
| SEMHOI                               | N9-C112       | 1.2893                         | -2.48808                         | 0.011          | -6.596                                  | -6.522         | 10.630         | 1.7281             |
| TIYDAI                               | C11-N2        | 1.2976                         | -2.58558                         | 0.019          | -6.696                                  | -6.569         | 10.680         | 1.7264             |
| TIYDOW01                             | C11-N8        | 1.3583                         | -3.47767                         | 0.017          | -6.916                                  | -6.803         | 10.242         | 1.7022             |
| TIYDOW02                             | C113-N20      | 1.3583                         | -3.47765                         | 0.017          | -6.916                                  | -6.803         | 10.242         | 1.7022             |
| TIYDOW                               | N15-C116      | 1.3764                         | -3.84732                         | 0.017          | -6.952                                  | -6.837         | 9.942          | 1.6959             |
| TIYDOW                               | N3-C14        | 1.3764                         | -3.84701                         | 0.017          | -6.952                                  | -6.837         | 9.942          | 1.6950             |
| TIYFAK                               | C11-N2        | 1.2990                         | -2.60807                         | 0.017          | -6.691                                  | -6.577         | 10.661         | 1.7259             |
| TUWDIY                               | C11-N3        | 1.3098                         | -2.84171                         | 0.017          | -6.706                                  | -6.595         | 10.459         | 1.7196             |
| XOLYAA                               | C12-N9        | 1.2995                         | -2.58249                         | 0.012          | -6.696                                  | -6.617         | 10.731         | 1.7282             |
| <b>NCLBA QM sp<sup>a</sup></b>       | <b>C11-N2</b> | <b>1.2351</b>                  | <b>-1.43495</b>                  | <b>0.021</b>   | <b>-7.3331</b>                          | <b>-7.2278</b> | <b>11.0618</b> | <b>1.7490</b>      |
| <b>NCLBA QM periodic<sup>b</sup></b> | <b>C11-N2</b> | <b>1.2350</b>                  | <b>-1.42000</b>                  | <b>0.020</b>   | <b>-6.36</b>                            | <b>-6.21</b>   | <b>11.15</b>   | <b>1.7490</b>      |
| <b>NCLBA expt<sup>c</sup></b>        | <b>CL1-N1</b> | <b>1.25(2)</b>                 | <b>5.1(4)</b>                    | <b>0.07(4)</b> | <b>-6.5(3)</b>                          | <b>-6.0(3)</b> | <b>17.6(2)</b> | <b>1.7490(2)</b>   |

<sup>a</sup> Single-point calculation on the molecule extracted from the crystal at 17.5 K.

<sup>b</sup> Single-point calculation on the frozen crystal structure.

<sup>c</sup> Multipole refinement against the experimental data. Estimated standard deviations are reported in parentheses.

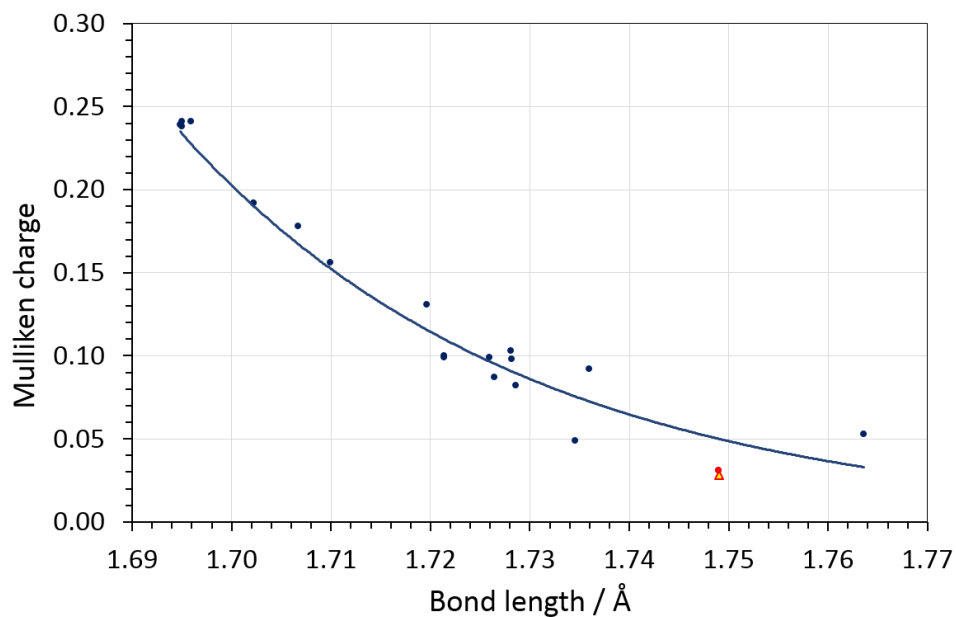

**Figure S6.** Mulliken net charge of Cl vs. covalent bond length along the series of halogenated imine compounds (Section S2 SI) here considered. Calculations come from D3 Grimme-corrected PBE0 wavefunctions at frozen experimental geometries using a pob-TZVP-rev2 triple-zeta valence + polarization basis set. Full red dot: NCLBA *in vacuo*. Red triangle: NCLBA in the solid-state. The curve has equation  $y = 2 \cdot 10^{20} \cdot \exp[-28.54]x$  and comes from a linear exponential fitting against the available data *in vacuo*.

S8. Electrostatic properties

**Table S6.** Experimental atomic net charges in the NCLBA crystal from Stewart and QTAIM dma

| Atom | Stewart       | QTAIM         |
|------|---------------|---------------|
| CL1  | -0.273 (.029) | -0.194 (.028) |
| F1   | -0.019 (.025) | -0.481 (.024) |
| N1   | -0.025 (.031) | -0.543 (.026) |
| N2   | -0.064 (.043) | -1.057 (.024) |
| C1   | -0.086 (.029) | 0.793 (.017)  |
| C2   | -0.170 (.034) | -0.204 (.021) |
| C3   | 0.006 (.044)  | -0.054 (.026) |
| C4   | 0.032 (.041)  | -0.074 (.024) |
| C5   | -0.044 (.041) | -0.117 (.022) |
| C6   | -0.030 (.041) | -0.046 (.021) |
| C7   | -0.034 (.042) | -0.127 (.023) |
| C8   | -0.008 (.032) | 0.238 (.020)  |
| C9   | 0.020 (.044)  | -0.032 (.024) |
| C10  | 0.005 (.040)  | -0.031 (.022) |
| C11  | -0.079 (.036) | 0.311 (.024)  |
| C12  | 0.029 (.042)  | 0.035 (.024)  |
| C13  | -0.051 (.042) | -0.114 (.023) |
| H3   | 0.080 (.028)  | 0.152 (.017)  |
| H4   | 0.091 (.028)  | 0.190 (.018)  |
| H5   | 0.048 (.028)  | 0.130 (.018)  |
| H6   | 0.055 (.029)  | 0.091 (.019)  |
| H7   | 0.031 (.029)  | 0.104 (.018)  |
| H9   | 0.056 (.028)  | 0.117 (.017)  |
| H10  | 0.097 (.028)  | 0.161 (.017)  |
| H12  | 0.054 (.030)  | 0.108 (.017)  |
| H13  | 0.031 (.031)  | 0.115 (.018)  |
| H2N  | 0.246 (.040)  | 0.527 (.015)  |

**Table S7.** Electrostatic properties of NCLBA.

```

*****
PAMOC                               Version 2010-07-27                               PAMOC

Molecular Electrostatic Multipole Moments
obtained from different DMA of the electron density
Units: electrons, Debye, Debye-Ang, Debye-Ang**2, Debye-Ang**3
Origin: Center of Mass - Reference System: Eigen-axes of the inertial tensor
<NCLBA2> NCL cpl=0.010; 10.07.21 da lp.tempo3 2a + 3a racc sec cry; 2021

M.Barzaghi@istm.cnr.it                www.istm.cnr.it/pamoc
*****
-----
Traceless Cartesian Tensors
-----

```

|  | L       | <O>                      | Stewart ( esds )     | QTAIM ( esds )        |
|--|---------|--------------------------|----------------------|-----------------------|
|  | 1 0 0   | <q>                      | 0.0000 ( 0.0000)     | 0.0000 ( 0.0000)      |
|  | 2 1 1   | <x>                      | 3.3051 ( 1.1121)     | 3.6247 ( 1.0011)      |
|  | 3 1 2   | <y>                      | -3.1749 ( 1.2983)    | -3.0622 ( 0.9385)     |
|  | 4 1 3   | <z>                      | -0.1303 ( 1.0275)    | -0.0985 ( 0.5238)     |
|  |         | Dipole                   | 4.5848 ( 0.9605)     | 4.7461 ( 0.6003)      |
|  | 5 2 1   | <xx>                     | -26.7291 ( 5.0784)   | -25.1837 ( 6.8059)    |
|  | 6 2 2   | <xy>                     | 22.1901 ( 3.9881)    | 21.8188 ( 4.3187)     |
|  | 7 2 3   | <yy>                     | 13.4098 ( 4.7394)    | 12.3772 ( 5.9101)     |
|  | 8 2 4   | <xz>                     | -4.0570 ( 2.1038)    | -3.9900 ( 2.4549)     |
|  | 9 2 5   | <yz>                     | -1.9954 ( 2.2769)    | -2.1960 ( 2.4693)     |
|  | 10 2 6  | <zz>                     | 13.3193 ( 2.3758)    | 12.8064 ( 2.6895)     |
|  |         | (<xx> + <yy> + <zz>)/3   | 0.0000 ( 0.0000)     | 0.0000 ( 0.0000)      |
|  |         | Anisotropy               | 7.4893 ( 0.5395)     | 7.3494 ( 0.7033)      |
|  | 11 3 1  | <xxx>                    | 13.5044 ( 16.4410)   | 18.4361 ( 32.7476)    |
|  | 12 3 2  | <yyy>                    | 83.4199 ( 14.0962)   | 84.2000 ( 22.9535)    |
|  | 13 3 3  | <zzz>                    | -11.1537 ( 13.5617)  | -12.7298 ( 17.0545)   |
|  | 14 3 4  | <xyy>                    | 32.8420 ( 12.8879)   | 31.7252 ( 22.7341)    |
|  | 15 3 5  | <xxy>                    | -67.8919 ( 12.1178)  | -68.1637 ( 21.0037)   |
|  | 16 3 6  | <xxz>                    | 56.7001 ( 10.0689)   | 57.0726 ( 13.4823)    |
|  | 17 3 7  | <xzz>                    | -46.3463 ( 11.5389)  | -50.1613 ( 23.2010)   |
|  | 18 3 8  | <yzz>                    | -15.5280 ( 11.7689)  | -16.0363 ( 16.6862)   |
|  | 19 3 9  | <yyz>                    | -45.5464 ( 9.1931)   | -44.3428 ( 13.8590)   |
|  | 20 3 10 | <xyz>                    | -24.8764 ( 7.5278)   | -24.3045 ( 10.7909)   |
|  |         | <xxx> + <xxy> + <xzz>    | 0.0000 ( 0.0000)     | 0.0000 ( 0.0000)      |
|  |         | <yyy> + <xxy> + <yzz>    | 0.0000 ( 0.0000)     | 0.0000 ( 0.0000)      |
|  |         | <zzz> + <xxz> + <yyz>    | 0.0000 ( 0.0000)     | 0.0000 ( 0.0000)      |
|  |         | Magnitude of vector part | 0.0000 ( 0.0000)     | 0.0000 ( 0.0000)      |
|  |         | Project. on dipole dir.  | 0.0000 ( 0.0000)     | 0.0000 ( 0.0000)      |
|  | 21 4 1  | <xxxx>                   | -135.8839 ( 86.7214) | -97.3262 ( 333.8155)  |
|  | 22 4 2  | <yyyy>                   | -97.3003 ( 69.0714)  | -81.6378 ( 164.7968)  |
|  | 23 4 3  | <zzzz>                   | -401.3795 ( 54.4895) | -393.2643 ( 140.7862) |
|  | 24 4 4  | <xxxy>                   | -222.0777 ( 67.7004) | -212.3872 ( 170.4764) |
|  | 25 4 5  | <xxxz>                   | -34.1662 ( 40.7199)  | -26.6456 ( 98.0714)   |
|  | 26 4 6  | <yyyx>                   | 223.6825 ( 78.6435)  | 212.9915 ( 196.6390)  |

|                          |   |    |        |           |   |          |           |   |           |
|--------------------------|---|----|--------|-----------|---|----------|-----------|---|-----------|
| 27                       | 4 | 7  | <yyyz> | 197.3588  | ( | 42.7574) | 191.8123  | ( | 94.9110)  |
| 28                       | 4 | 8  | <zzzx> | 93.1131   | ( | 33.9757) | 91.4009   | ( | 95.4273)  |
| 29                       | 4 | 9  | <zzzy> | 120.1422  | ( | 42.1989) | 125.6857  | ( | 96.4758)  |
| 30                       | 4 | 10 | <xxyy> | -84.0976  | ( | 61.7704) | -107.1501 | ( | 186.3519) |
| 31                       | 4 | 11 | <xxzz> | 219.9815  | ( | 47.9901) | 204.4764  | ( | 172.7155) |
| 32                       | 4 | 12 | <yyzz> | 181.3980  | ( | 48.6390) | 188.7880  | ( | 120.5702) |
| 33                       | 4 | 13 | <xxyz> | -317.5010 | ( | 30.0437) | -317.4980 | ( | 70.4613)  |
| 34                       | 4 | 14 | <yyxz> | -58.9469  | ( | 40.6247) | -64.7553  | ( | 80.4396)  |
| 35                       | 4 | 15 | <zzxy> | -1.6049   | ( | 32.1860) | -0.6043   | ( | 68.7406)  |
| <xxxx> + <xxyy> + <xxzz> |   |    |        | 0.0000    | ( | 0.0000)  | 0.0000    | ( | 0.0000)   |
| <yyyy> + <xxyy> + <yyzz> |   |    |        | 0.0000    | ( | 0.0000)  | 0.0000    | ( | 0.0000)   |
| <zzzz> + <yyzz> + <xxzz> |   |    |        | 0.0000    | ( | 0.0000)  | 0.0000    | ( | 0.0000)   |
| <xxxy> + <yyyx> + <zzxy> |   |    |        | 0.0000    | ( | 0.0000)  | 0.0000    | ( | 0.0000)   |
| <xxxz> + <zzzx> + <yyxz> |   |    |        | 0.0000    | ( | 0.0000)  | 0.0000    | ( | 0.0000)   |
| <yyyz> + <zzzy> + <xxyz> |   |    |        | 0.0000    | ( | 0.0000)  | 0.0000    | ( | 0.0000)   |
| Isotropic value          |   |    |        | 0.0000    | ( | 0.0000)  | 0.0000    | ( | 0.0000)   |

---

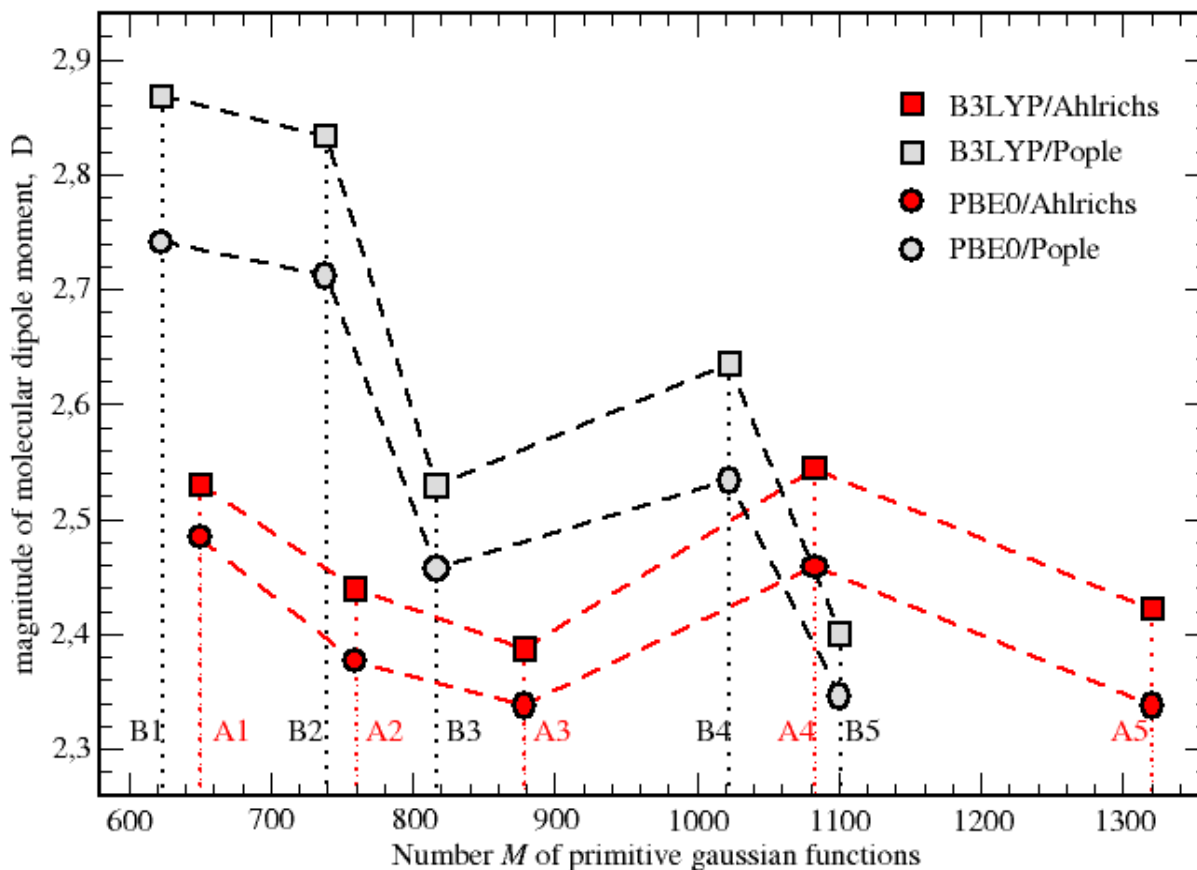

**Figure S7:** Basis set convergence of the molecular dipole moment magnitude of NCLBA in vacuum for two basis set families (Ahlich: red symbols, Pople: grey symbols) and two density functionals (B3LYP: squares, PBE0: circles). For each density functional, the dashed lines connect the points belonging to the same basis set family. Vertical dotted lines mark the individual basis sets (A1: pob-TZVP-rev2,  $M = 651$ ; A2: def2-TZVP (-f),  $M = 760$ ; A3: def2-TZVP,  $M = 879$ ; A4: def2-aug-TZVPP(-f),  $M = 1083$ ; A5: def2-aug-TZVPP,  $M = 1321$ ).

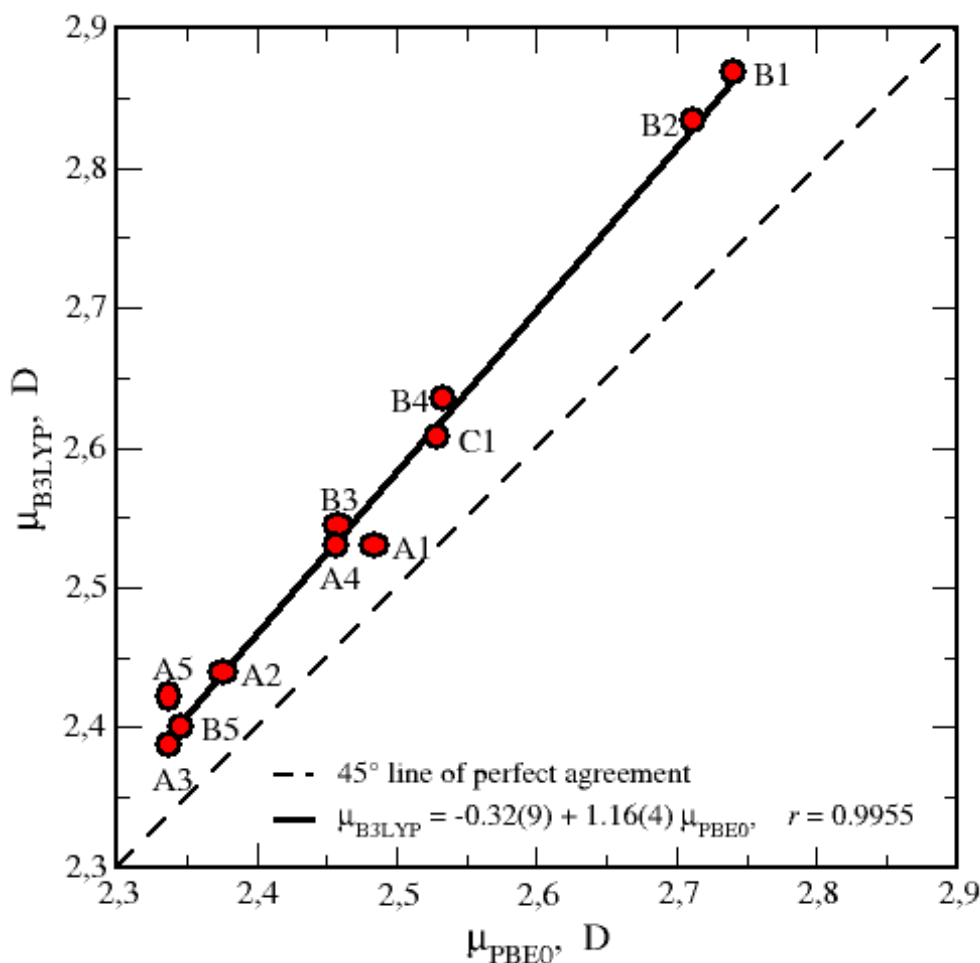

**Figure S8.** Relationship between B3LYP and PBE0 values of the NCLBA dipole moment magnitude calculated using the basis sets specified in Section S7 above.

*Comments to Figures S7 and S8:*

Figure S8 shows that the B3LYP predictions somewhat overestimate the magnitude of the molecular dipole. However, two effects that are worth of note. First, the predictions tend to cluster around similar values as the magnitude of the basis set increases. Second, differences between B3LYP and PBE0 hamiltonians become smaller and smaller as the magnitude of the basis set increases. The same information can be retrieved from Figure S7. In our opinion, this is a good indication of convergence. We do not demand that convergence be exact, a requirement that would be fulfilled only in the limit of a complete basis set. The accurate estimation of static electrostatic properties is much more demanding than convergence on geometrical parameters and we consider that our simulations provide a reasonable and satisfactory tradeoff between the required accuracy and the computational cost. In any case, it is worth noting that the experimentally estimated standard deviations on the magnitude of the dipole moment are one order of magnitude larger than differences among the theoretically predicted dipole moment lengths.



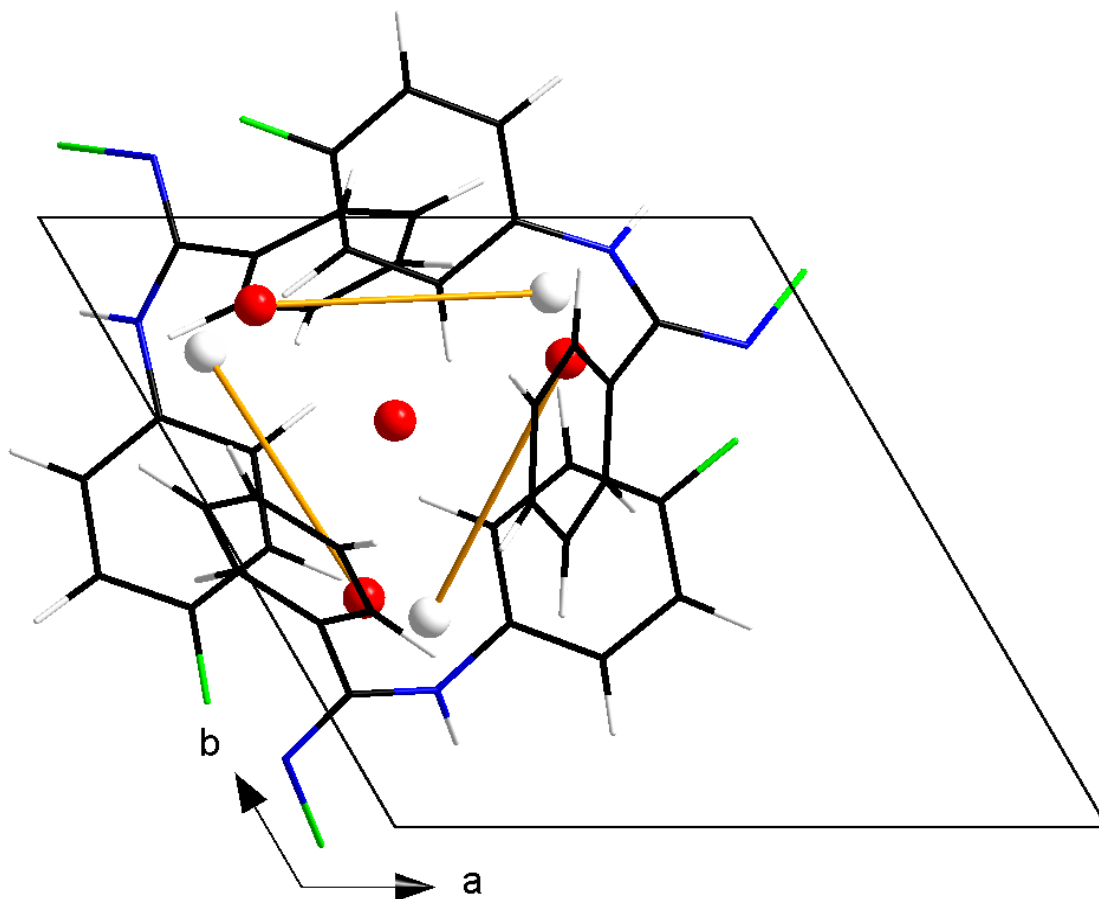

**Figure S9.** Mutual orientation of molecular dipole moments in the experimental unit cell of NCLBA at  $T = 17.5$  K. White spheres: origin of the dipole moment (molecular centre of mass, negative extremity). Red spheres: positive extremities. The dipole total moment is at the centre of the  $3_1$  helix motif and points upwards parallel to the  $c$  axis.

## References

- (1) Destro, R. Experimental Determination of Scan-Truncation Losses from Low-Temperature (16 K) Single-Crystal X-Ray Measurements. *Aust. J. Phys.* **1988**, *41* (3), 503–510.
- (2) Destro, R.; Marsh, R. E. Scan-Truncation Corrections in Single-Crystal Diffractometry: An Empirical Method. *Acta Crystallogr. Sect. A Found. Crystallogr.* **1987**, *43* (5), 711–718.
- (3) Destro, R.; Marsh, R. E. On Predicting Scan Profiles: The Nature of the ‘aberration Function’. *Acta Crystallogr. Sect. A Found. Crystallogr.* **1993**, *49* (1), 183–190.
- (4) Destro, R.; Ruffo, R.; Roversi, P.; Soave, R.; Loconte, L.; Lo Presti, L. Anharmonic Motions versus Dynamic Disorder at the Mg Ion from the Charge Densities in Pyrope (Mg<sub>3</sub>Al<sub>2</sub>Si<sub>3</sub>O<sub>12</sub>) Crystals at 30 K: Six of One, Half a Dozen of the Other. *Acta Crystallogr. Sect. B Struct. Sci. Cryst. Eng. Mater.* **2017**, *73* (4), 722–736.
- (5) Gatti, C.; May, E.; Destro, R.; Cargnoni, F. Fundamental Properties and Nature of CH··O Interactions in Crystals on the Basis of Experimental and Theoretical Charge Densities. The Case of 3,4-Bis(Dimethylamino)-3-Cyclobutene-1,2-Dione (DMACB) Crystal. *J. Phys. Chem. A* **2002**, *106* (11), 2707–2720.
- (6) Destro, R.; Roversi, P.; Barzagli, M.; Lo Presti, L. Anharmonic Thermal Motion Modelling in the Experimental XRD Charge Density Determination of 1-Methyluracil at T = 23 K. *Molecules* **2021**, *26* (11), 3075.
- (7) Vilela Oliveira, D.; Laun, J.; Peintinger, M. F.; Bredow, T. BSSE-Correction Scheme for Consistent Gaussian Basis Sets of Double- and Triple-Zeta Valence with Polarization Quality for Solid-State Calculations. *J. Comput. Chem.* **2019**, *40* (27), 2364–2376.
- (8) Peintinger, M. F.; Oliveira, D. V.; Bredow, T. Consistent Gaussian Basis Sets of Triple-Zeta Valence with Polarization Quality for Solid-State Calculations. *J. Comput. Chem.* **2013**, *34* (6), 451–459.
- (9) Adamo, C.; Barone, V. Toward Reliable Density Functional Methods without Adjustable Parameters: The PBE0 Model. *J. Chem. Phys.* **1999**, *110* (13), 6158.
- (10) Dovesi, R.; Erba, A.; Orlando, R.; Zicovich-Wilson, C. M.; Civalleri, B.; Maschio, L.; Rérat, M.; Casassa, S.; Baima, J.; Salustro, S.; et al. Quantum-Mechanical Condensed Matter Simulations with CRYSTAL. *Wiley Interdiscip. Rev. Comput. Mol. Sci.* **2018**, *8* (4), 1360.
- (11) Weigend, F.; Ahlrichs, R. Balanced Basis Sets of Split Valence, Triple Zeta Valence and Quadruple Zeta Valence Quality for H to Rn: Design and Assessment of Accuracy. *Phys. Chem. Chem. Phys.* **2005**, *7* (18), 3297–3305.
- (12) Krishnan, R.; Binkley, J. S.; Seeger, R.; Pople, J. A. Self-consistent Molecular Orbital Methods. XX. A Basis Set for Correlated Wave Functions. *J. Chem. Phys.* **2008**, *72* (1), 650.
- (13) Jensen, F. Contracted Basis Sets for Density Functional Calculations: Segmented versus General Contraction. *J. Chem. Phys.* **2005**, *122* (7), 074111.
- (14) Stephens, P. J.; Devlin, F. J.; Chabalowski, C. F.; Frisch, M. J. Ab Initio Calculation of Vibrational Absorption and Circular Dichroism Spectra Using Density Functional Force Fields. *J. Phys. Chem.* **2002**, *98* (45), 11623–11627.
- (15) Lee, C.; Yang, W.; Parr, R. G. Development of the Colle-Salvetti Correlation-Energy Formula into a Functional of the Electron Density. *Phys. Rev. B* **1988**, *37* (2), 785.
- (16) Becke, A. D. Density-functional Thermochemistry. III. The Role of Exact Exchange. *J. Chem. Phys.* **1998**, *98* (7), 5648.
- (17) Vosko, S. H.; Wilk, L.; Nusair, M. Accurate Spin-Dependent Electron Liquid Correlation Energies for Local Spin Density Calculations: A Critical Analysis. *Can. J. Phys.* **1980**, *58* (8), 1200–1211.
- (18) Grimme, S. Semiempirical Hybrid Density Functional with Perturbative Second-Order Correlation. *J. Chem. Phys.* **2006**, *124* (3), 034108.
- (19) Hickey, A. L.; Rowley, C. N. Benchmarking Quantum Chemical Methods for the Calculation of Molecular Dipole Moments and Polarizabilities. *J. Phys. Chem. A* **2014**, *118* (20), 3678–

3687.

- (20) Hait, D.; Head-Gordon, M. How Accurate Is Density Functional Theory at Predicting Dipole Moments? An Assessment Using a New Database of 200 Benchmark Values. *J. Chem. Theory Comput.* **2018**, *14* (4), 1969–1981.
- (21) Zapata, J. C.; McKemmish, L. K. Computation of Dipole Moments: A Recommendation on the Choice of the Basis Set and the Level of Theory. *J. Phys. Chem. A* **2020**, *124* (37), 7538–7548.
